# Supplementary material for: VALORIS: A privacy-aware logistic regression method for vertically partitioned data within a novel privacy risk assessment framework
Source: Research Square preprint supplement (doi:10.21203/rs.3.rs-7110391/v1), 2025-07-21
Supplement: Supplementary file 1 [file d1388b646cd50b93445fcea1.pdf]

1 **VALORIS: A privacy-aware logistic regression method for**  
2 **vertically partitioned data within a novel privacy risk assess-**  
3 **ment framework - Supplementary Information**

4 **Supplementary Tables 1**

**Fig. S1** Glossary for general notation conventions

|                                                                                         |                                                       |                                                            |
|-----------------------------------------------------------------------------------------|-------------------------------------------------------|------------------------------------------------------------|
| Random variable in $\mathbb{R}$                                                         | $A$                                                   | Uppercase Non-italic                                       |
| Random vector in $\mathbb{R}^p$                                                         | $\mathbf{A}$                                          | Uppercase Non-italic bold                                  |
| Scalar in $\mathbb{R}$                                                                  | $a$                                                   | Lowercase Italic                                           |
| Vector in $\mathbb{R}^p$                                                                | $\mathbf{a}$                                          | Lowercase Italic bold                                      |
| Vector in $\mathbb{R}^p$ with all components equal to 1                                 | $\mathbf{1}_p$                                        | -                                                          |
| Matrix in $\mathbb{R}^{n \times p}$                                                     | $\mathbf{A}$                                          | Uppercase Italic bold                                      |
| Identity matrix in $\mathbb{R}^{n \times n}$                                            | $\mathbf{I}_n$                                        | -                                                          |
| Gradient of $f(\boldsymbol{\theta})$ (column vector)                                    | $\nabla_{\boldsymbol{\theta}} f(\boldsymbol{\theta})$ | $\nabla_{\boldsymbol{\theta}}^2$ for Hessian               |
| $\nabla_{\boldsymbol{\theta}} f(\boldsymbol{\theta}) _{\boldsymbol{\theta}=\mathbf{a}}$ | $\nabla_{\boldsymbol{\theta}} f(\mathbf{a})$          | $\nabla_{\boldsymbol{\theta}}^2 f(\mathbf{a})$ for Hessian |
| $\max_{1 \leq j \leq p}  a_j $                                                          | $\ \mathbf{a}\ _{\infty}$                             | Infinite norm                                              |
| $\sum_{j=1}^p  a_j $                                                                    | $\ \mathbf{a}\ _1$                                    | $\ell_1$ -norm                                             |
| $\sqrt{\sum_{j=1}^p a_j^2}$                                                             | $\ \mathbf{a}\ _2$                                    | $\ell_2$ -norm                                             |
| Diagonal matrix with entries of $\mathbf{a}$ on diagonal                                | $\text{diag}(\mathbf{a})$                             | Dimension $p \times p$ for $\mathbf{a} \in \mathbb{R}^p$   |
| Quantity $\cdot$ at iteration $t$ (step count)                                          | $\cdot_{(t)}$                                         | Starts with $\cdot_{(0)}$                                  |

**Fig. S2** Glossary for quantities that pertain to the regression settings

|                                                             |                                                                                                                                                                                                                    |
|-------------------------------------------------------------|--------------------------------------------------------------------------------------------------------------------------------------------------------------------------------------------------------------------|
| Analytical dataset with sample size $n$                     | $\mathcal{D} = \{\dots\}_{i=1}^n$                                                                                                                                                                                  |
| Covariate vector for $i$ th individual                      | $\mathbf{x}_i = [x_{i1}, \dots, x_{ip}]^{\top}$                                                                                                                                                                    |
| Covariate vector for $i$ th individual with intercept       | $[1, \mathbf{x}_i^{\top}]^{\top}$                                                                                                                                                                                  |
| Covariate matrix in $\mathbb{R}^{n \times p}$               | $\mathbf{X} = \begin{bmatrix} x_{11} & \cdots & x_{1p} \\ \vdots & \ddots & \vdots \\ x_{n1} & \cdots & x_{np} \end{bmatrix} = \begin{bmatrix} \mathbf{x}_1^{\top} \\ \vdots \\ \mathbf{x}_n^{\top} \end{bmatrix}$ |
| Gram matrix                                                 | $\mathbf{K} = [\mathbf{X} \mathbf{1}_n] [\mathbf{X} \mathbf{1}_n]^{\top}$                                                                                                                                          |
| True (unknown) parameters                                   | $\beta_{0*}, \boldsymbol{\beta}_*$                                                                                                                                                                                 |
| Exact MLE of the parameter                                  | $\hat{\beta}_0, \hat{\boldsymbol{\beta}}$                                                                                                                                                                          |
| Exact penalized estimate of the parameter                   | $\hat{\beta}_0^{\lambda}, \hat{\boldsymbol{\beta}}^{\lambda}$                                                                                                                                                      |
| Estimate obtained via numerical approximation               | $\tilde{\beta}_0, \tilde{\boldsymbol{\beta}}, \tilde{\beta}_0^{\lambda}, \tilde{\boldsymbol{\beta}}^{\lambda}$                                                                                                     |
| Log-likelihood                                              | $\ell_n(\boldsymbol{\beta}) = \frac{1}{n} \sum_{i=1}^n \log(\cdot)$                                                                                                                                                |
| Penalized log-likelihood                                    | $l_n^{\lambda}(\boldsymbol{\beta})$                                                                                                                                                                                |
| Mean of the $j$ th column in covariate matrix               | $u_{n,j}$                                                                                                                                                                                                          |
| Standard deviation of the $j$ th column in covariate matrix | $s_{n,j}$                                                                                                                                                                                                          |
| Fisher information matrix                                   | $\mathcal{I}(\beta_0, \boldsymbol{\beta})$                                                                                                                                                                         |

**Fig. S3** Glossary for quantities specific to the vertical setting

|                                                                           |                                                                                        |
|---------------------------------------------------------------------------|----------------------------------------------------------------------------------------|
| Number of covariate-nodes                                                 | $K$                                                                                    |
| Number of covariates at covariate-node $k$                                | $p^{(k)}$                                                                              |
| Covariate matrix at covariate-node $k$                                    | $\mathbf{X}^{(k)}$                                                                     |
| Centered and scaled covariate matrix at covariate-node $k$                | $\mathbf{X}_{\text{cs}}^{(k)}$                                                         |
| Mean and s.d. of the $j$ th column in $\mathbf{X}^{(k)}$                  | $u_{n,j}^{(k)}, s_{n,j}^{(k)}$                                                         |
| Gram matrix at covariate-node $k$                                         | $\mathbf{K}^{(k)} := \mathbf{X}_{\text{cs}}^{(k)} (\mathbf{X}_{\text{cs}}^{(k)})^\top$ |
| Dual parameter estimates (numerical approx.)                              | $\tilde{\alpha}^\lambda$                                                               |
| Penalized estimate associated with covariate-node $k$ (numerical approx.) | $\tilde{\beta}_j^{\lambda(k)}$                                                         |
| Standard errors associated with covariate-node $k$ (numerical approx.)    | $\tilde{\sigma}_j^{\lambda(k)}$                                                        |
| Matrix in null-space of $\mathbf{K}^{(k)}$                                | $\mathcal{N}^{(k)}$                                                                    |
| Intermediary quantities                                                   | $\tilde{\mathbf{c}}^{\lambda(k)}, \tilde{\mathbf{S}}$                                  |

## 5 Supplementary Notes 1

6 The code for the implementation of the algorithm using R  
7 is available at: [https://github.com/OpenLHS/Distrib\\_analysis/tree/main/Vertically\\_distributed\\_analysis/logistic\\_regression\\_nonpenalized](https://github.com/OpenLHS/Distrib_analysis/tree/main/Vertically_distributed_analysis/logistic_regression_nonpenalized). It  
8 includes an automated example with simulated data. The folder also  
9 includes a basic implementation of the tool that supports the privacy  
10 assessment to verify if an infinite number of solutions exists in some  
11 settings.  
12

# Supplementary Methods 1 Theoretical derivations for the optimization problem

In the followings, for any  $(\beta_0, \boldsymbol{\beta})$  let

$$\begin{aligned} \mathcal{I}(\beta_0, \boldsymbol{\beta}) &= -\nabla_{\beta_0, \boldsymbol{\beta}}^2 \ell_n(\beta_0, \boldsymbol{\beta}) \\ &= \frac{1}{n} \sum_{i=1}^n \frac{\exp\{y_i(\beta_0 + \mathbf{x}_i^\top \boldsymbol{\beta})\}}{[1 + \exp\{y_i(\beta_0 + \mathbf{x}_i^\top \boldsymbol{\beta})\}]^2} \begin{bmatrix} 1 & \mathbf{x}_i^\top \\ \mathbf{x}_i & \mathbf{x}_i \mathbf{x}_i^\top \end{bmatrix}. \end{aligned} \quad (\text{S1})$$

In this notation,  $\mathcal{I}(\widehat{\beta}_0, \widehat{\boldsymbol{\beta}})$  corresponds to the observed Fisher information matrix introduced in Equation (10) in the manuscript.

The following lemma establishes that the unique solution to the ridge-penalized log-likelihood maximization problem for logistic regression can be obtained by solving its dual formulation, which is a minimization problem over a compact search space. This result implies that, for a given sample and a fixed  $\lambda$ , the solution to the dual minimization problem cannot lie arbitrarily close to the boundary of the domain  $(0, 1)^n$ .

**Lemma S1.** *For any  $(y_1, \mathbf{x}_1), \dots, (y_n, \mathbf{x}_n) \in \{-1, 1\} \times \mathbb{R}^p$ , the unique maximizer  $(\check{\beta}_0^\lambda, \check{\boldsymbol{\beta}}^\lambda)$  of the maximization problem*

$$\begin{aligned} \max_{\beta_0 \in \mathbb{R}, \boldsymbol{\beta} \in \mathbb{R}^p} & \left( \check{\ell}_n^\lambda(\beta_0, \boldsymbol{\beta}) \right. \\ & \left. = n^{-1} \sum_{i=1}^n \log \left[ \frac{1}{1 + \exp\{-y_i(\beta_0 + \mathbf{x}_i^\top \boldsymbol{\beta})\}} \right] - \frac{\lambda}{2} \sum_{j=0}^p \beta_j^2 \right) \end{aligned} \quad (\text{S2})$$

satisfies

$$\begin{bmatrix} \check{\beta}_0^\lambda \\ \check{\boldsymbol{\beta}}^\lambda \end{bmatrix} = (n\lambda)^{-1} \sum_{i=1}^n y_i \check{\alpha}_i^\lambda \begin{bmatrix} 1 \\ \mathbf{x}_i \end{bmatrix},$$

where  $\check{\boldsymbol{\alpha}}^\lambda = (\check{\alpha}_1^\lambda, \dots, \check{\alpha}_n^\lambda)^\top \in (0, 1)^n$  is the unique solution to the following minimization problem:

$$\begin{aligned} \min_{\boldsymbol{\alpha} \in (\Theta_{\boldsymbol{\alpha}, \lambda}^\mathbf{x})^n} & \left( \frac{1}{n} \sum_{i=1}^n \left\{ (1 - \alpha_i) \log(1 - \alpha_i) + \alpha_i \log(\alpha_i) \right\} \right. \\ & \left. + \frac{1}{2\lambda n^2} \sum_{i=1}^n \sum_{j=1}^n \alpha_i \alpha_j y_i y_j (\mathbf{x}_i^\top \mathbf{x}_j + 1) \right), \end{aligned} \quad (\text{S3})$$

with  $\Theta_{\alpha,\lambda}^{\mathbf{X}} = [\{1 + \exp(b_{\mathbf{X}}^{\lambda})\}^{-1}, \{1 + \exp(-b_{\mathbf{X}}^{\lambda})\}^{-1}]$ ,

where  $b_{\mathbf{X}}^{\lambda} = (p+1)(n\lambda)^{-1}\{\sum_{i=1}^n (\|\mathbf{x}_i\|_{\infty} + 1)\}^2$ . Moreover,  $\check{\alpha}^{\lambda}$  is the unique stationary point of the objective function in (S3), and the set  $\Theta_{\alpha,\lambda}^{\mathbf{X}}$  can be replaced by  $(0, 1)$ .

*Proof of Lemma S1.* We begin by showing that the search space  $\mathbb{R} \times \mathbb{R}^p$  in the maximization program on the first line at (S2) can be replaced by a suitably chosen compact set. To this end, we first note that the function  $(\beta_0, \boldsymbol{\beta}) \mapsto \check{l}_n^{\lambda}(\beta_0, \boldsymbol{\beta})$  is strongly concave. This follows upon observing that as  $\check{l}_n^{\lambda}(\beta_0, \boldsymbol{\beta}) = \ell_n(\beta_0, \boldsymbol{\beta}) - (\lambda/2) \sum_{j=0}^p \beta_j^2$ , from (S1) we have

$$\nabla_{\beta_0, \boldsymbol{\beta}}^2 \check{l}_n^{\lambda}(\beta_0, \boldsymbol{\beta}) = - \left( \frac{1}{n} \sum_{i=1}^n \frac{\exp\{y_i(\beta_0 + \mathbf{x}_i^{\top} \boldsymbol{\beta})\}}{[1 + \exp\{y_i(\beta_0 + \mathbf{x}_i^{\top} \boldsymbol{\beta})\}]^2} \begin{bmatrix} 1 & \mathbf{x}_i^{\top} \\ \mathbf{x}_i & \mathbf{x}_i \mathbf{x}_i^{\top} \end{bmatrix} + \lambda \mathbf{I}_{p+1} \right).$$

Since the first term inside the parentheses is a weighted sum of positive semi-definite matrices with strictly positive weights, and the second term is a diagonal matrix with strictly positive entries, their sum is positive definite. This implies that the Hessian  $\nabla_{\beta_0, \boldsymbol{\beta}}^2 \check{l}_n^{\lambda}(\beta_0, \boldsymbol{\beta})$  is negative definite, and therefore, the penalized log-likelihood function  $\check{l}_n^{\lambda}(\beta_0, \boldsymbol{\beta})$  is strongly concave.

As  $\check{l}_n^{\lambda}(\beta_0, \boldsymbol{\beta})$  is strongly concave, its maximum is unique and is achieved at the point  $(\check{\beta}_0^{\lambda}, \check{\boldsymbol{\beta}}^{\lambda})$  that satisfies

$$n^{-1} \sum_{i=1}^n \frac{y_i}{1 + \exp\{y_i(\check{\beta}_0^{\lambda} + \mathbf{x}_i^{\top} \check{\boldsymbol{\beta}}^{\lambda})\}} \begin{bmatrix} 1 \\ \mathbf{x}_i \end{bmatrix} = \lambda \begin{bmatrix} \check{\beta}_0^{\lambda} \\ \check{\boldsymbol{\beta}}^{\lambda} \end{bmatrix}.$$

By the triangle inequality, the latter equation implies

$$\max_{0 \leq j \leq p} |\check{\beta}_j^{\lambda}| \leq \lambda^{-1} \left( n^{-1} \sum_{i=1}^n (\|\mathbf{x}_i\|_{\infty} + 1) \right). \quad (\text{S4})$$

Therefore, letting  $\Theta_{\beta,\lambda}^{\mathbf{X}} = \{\beta \in \mathbb{R} : |\beta| \leq (n\lambda)^{-1} \sum_{i=1}^n (\|\mathbf{x}_i\|_{\infty} + 1)\}$ , it holds for any  $\mathbf{x}_1, \dots, \mathbf{x}_n \in \mathbb{R}^p$  that

$$\max_{\beta_0 \in \mathbb{R}, \boldsymbol{\beta} \in \mathbb{R}^p} n^{-1} \sum_{i=1}^n \log \left\{ \frac{1}{1 + \exp\{-y_i(\beta_0 + \mathbf{x}_i^{\top} \boldsymbol{\beta})\}} \right\} - \frac{\lambda}{2} \sum_{j=0}^p \beta_j^2$$

$$= \max_{\beta_0 \in \Theta_{\beta, \lambda}^{\mathbf{x}}, \beta \in (\Theta_{\beta, \lambda}^{\mathbf{x}})^p} n^{-1} \sum_{i=1}^n \log \left\{ \frac{1}{1 + \exp\{-y_i(\beta_0 + \mathbf{x}_i^\top \beta)\}} \right\} - \frac{\lambda}{2} \sum_{j=0}^p \beta_j^2.$$

Next, we show that

$$\begin{aligned} & \max_{\beta_0 \in \Theta_{\beta, \lambda}^{\mathbf{x}}, \beta \in (\Theta_{\beta, \lambda}^{\mathbf{x}})^p} n^{-1} \sum_{i=1}^n \log \left\{ \frac{1}{1 + \exp\{-y_i(\beta_0 + \mathbf{x}_i^\top \beta)\}} \right\} - \frac{\lambda}{2} \sum_{j=0}^p \beta_j^2 \\ &= \max_{\beta_0 \in \Theta_{\beta, \lambda}^{\mathbf{x}}, \beta \in (\Theta_{\beta, \lambda}^{\mathbf{x}})^p} \min_{\alpha \in (\Theta_{\alpha, \lambda}^{\mathbf{x}})^n} n^{-1} \sum_{i=1}^n \left\{ y_i(\beta_0 + \mathbf{x}_i^\top \beta)(1 - \alpha_i) \right\} - \frac{\lambda}{2} \sum_{j=0}^p \beta_j^2 \\ & \quad + n^{-1} \sum_{i=1}^n \left\{ (1 - \alpha_i) \log(1 - \alpha_i) + \alpha_i \log(\alpha_i) \right\}, \quad (\text{S5}) \end{aligned}$$

with  $\Theta_{\alpha, \lambda}^{\mathbf{x}}$  as in (S3).

To establish this result, we begin by noting that for any  $x \in [a, b]$ , we have

$$\log \left( \frac{1}{1 + e^{-x}} \right) = \min_{\alpha \in [(1+e^{-a})^{-1}, (1+e^{-b})^{-1}]} \alpha x + (1 - \alpha) \log(1 - \alpha) + \alpha \log(\alpha). \quad (\text{S6})$$

To see why (S6) holds, it suffices to first verify that the function  $\alpha \mapsto \alpha x + (1 - \alpha) \log(1 - \alpha) + \alpha \log(\alpha)$  attains its minimum at  $\alpha = (1 + e^x)^{-1}$ . Substituting  $\alpha = (1 + e^x)^{-1}$ , we obtain

$$\begin{aligned} & \min_{\alpha \in (0,1)} \alpha x + (1 - \alpha) \log(1 - \alpha) + \alpha \log(\alpha) \\ &= \frac{x}{1 + e^x} + \left( \frac{e^x}{1 + e^x} \right) \log \left( \frac{e^x}{1 + e^x} \right) + \left( \frac{1}{1 + e^x} \right) \log \left( \frac{1}{1 + e^x} \right) \\ &= \log \left( \frac{e^x}{1 + e^x} \right) = \log \left( \frac{1}{1 + e^{-x}} \right). \end{aligned}$$

From this, (S6) follows directly from the fact that  $x \in [a, b]$ .

Since

$$\begin{aligned} & \max_{\beta_0 \in \Theta_{\beta, \lambda}^{\mathbf{x}}, \beta \in (\Theta_{\beta, \lambda}^{\mathbf{x}})^p} \max_{1 \leq i \leq n} |y_i(\beta_0 + \mathbf{x}_i^\top \beta)| \\ & \leq (p + 1) \left( \max_{1 \leq i \leq n} \|\mathbf{x}_i\|_\infty + 1 \right) \left( (n\lambda)^{-1} \sum_{i=1}^n (\|\mathbf{x}_i\|_\infty + 1) \right) \end{aligned}$$

$$\leq (p+1)(n\lambda)^{-1} \left( \sum_{i=1}^n (\|\mathbf{x}_i\|_\infty + 1) \right)^2 = b_{\mathbf{X}}^\lambda,$$

where  $b_{\mathbf{X}}^\lambda$  is defined in the statement of the lemma, the proof that (S5) holds follows from (S6), which ensures that

$$\begin{aligned} & \sum_{i=1}^n \log \left[ \frac{1}{1 + \exp\{-y_i(\beta_0 + \mathbf{x}_i^\top \boldsymbol{\beta})\}} \right] \\ &= \sum_{i=1}^n \min_{\alpha_i \in \Theta_{\alpha, \lambda}^{\mathbf{x}}} \left\{ y_i(\beta_0 + \mathbf{x}_i^\top \boldsymbol{\beta})\alpha_i + (1 - \alpha_i) \log(1 - \alpha_i) + \alpha_i \log(\alpha_i) \right\} \\ &= \min_{\boldsymbol{\alpha} \in (\Theta_{\alpha, \lambda}^{\mathbf{x}})^n} \sum_{i=1}^n \left\{ y_i(\beta_0 + \mathbf{x}_i^\top \boldsymbol{\beta})\alpha_i + (1 - \alpha_i) \log(1 - \alpha_i) + \alpha_i \log(\alpha_i) \right\}. \end{aligned}$$

To conclude the proof of the lemma, it remains to show that in the optimization problem given on the second line of (S5), we can interchange the maximum and minimum operations and then solve the inner maximization problem explicitly.

To prove that we can swap the max and the min, we apply Sion's minimax theorem [1, 2]. To justify the application of this theorem and conclude that the order of the minimum and maximum operators can be interchanged, we must verify that the function

$$\begin{aligned} g(\beta_0, \boldsymbol{\beta}, \boldsymbol{\alpha}) &:= \sum_{i=1}^n \left[ y_i(\beta_0 + \mathbf{x}_i^\top \boldsymbol{\beta})\alpha_i + \{(1 - \alpha_i) \log(1 - \alpha_i) + \alpha_i \log(\alpha_i)\} \right] \\ &\quad - \frac{\lambda}{2} \sum_{j=0}^p \beta_j^2 \end{aligned}$$

is such that for any fixed  $(\beta_0, \boldsymbol{\beta})$ ,  $\boldsymbol{\alpha} \mapsto g(\beta_0, \boldsymbol{\beta}, \boldsymbol{\alpha})$  is convex, and for any fixed  $\boldsymbol{\alpha}$ ,  $(\beta_0, \boldsymbol{\beta}) \mapsto g(\beta_0, \boldsymbol{\beta}, \boldsymbol{\alpha})$  is concave. Once these conditions are established, Sion's theorem guarantees that the maximum and minimum operators can be interchanged.

The convexity of  $\boldsymbol{\alpha} \mapsto g(\beta_0, \boldsymbol{\beta}, \boldsymbol{\alpha})$  follows from the fact  $\nabla_{\boldsymbol{\alpha}}^2 g(\beta_0, \boldsymbol{\beta}, \boldsymbol{\alpha})$  is a diagonal matrix, with diagonal entries given by the following, for  $j \in \{1, \dots, n\}$ :

$$[\nabla_{\boldsymbol{\alpha}}^2 g(\beta_0, \boldsymbol{\beta}, \boldsymbol{\alpha})]_{jj} = \{\alpha_j(1 - \alpha_j)\}^{-1} \geq 1/4.$$

71 Since each diagonal entry is positive for all  $\alpha \in (0, 1)^n$  and  $(\beta_0, \beta) \in$   
 72  $(\Theta_{\beta, \lambda}^{\mathbf{x}})^{p+1}$ , the Hessian is positive definite, which ensures that  $\alpha \mapsto$   
 73  $g(\beta_0, \beta, \alpha)$  is convex in  $\alpha$  for all  $(\beta_0, \beta)$ .

74 The concavity of  $(\beta_0, \beta) \mapsto g(\beta_0, \beta, \alpha)$  follows from the fact that  
 75  $\nabla_{\beta_0, \beta}^2 g(\beta_0, \beta) = -\lambda \mathbf{I}_{p+1}$ , with  $\mathbf{I}_{p+1}$  the identity matrix of size  $(p+1) \times$   
 76  $(p+1)$ . As the Hessian of  $g(\beta_0, \beta, \alpha)$  with respect to  $(\beta_0, \beta)$  is a diago-  
 77 nal matrix with negative entries, it is therefore negative definite, which  
 78 ensures that  $(\beta_0, \beta) \mapsto g(\beta_0, \beta, \alpha)$  is concave for all  $(\beta_0, \beta)$  and  $\alpha$ .

79 Since we have just proved that for any fixed  $(\beta_0, \beta)$ ,  $\alpha \mapsto g(\beta_0, \beta, \alpha)$   
 80 is convex, and for any fixed  $\alpha$ ,  $(\beta_0, \beta) \mapsto g(\beta_0, \beta, \alpha)$  is concave, we can  
 81 apply Sion's minimax theorem, which, from (S5), ensures that

$$\begin{aligned} & \max_{\beta_0 \in \Theta_{\beta, \lambda}^{\mathbf{x}}, \beta \in (\Theta_{\beta, \lambda}^{\mathbf{x}})^p} \min_{\alpha \in (\Theta_{\alpha, \lambda}^{\mathbf{x}})^n} n^{-1} \sum_{i=1}^n \left\{ y_i (\beta_0 + \mathbf{x}_i^\top \beta) \alpha_i \right\} - \frac{\lambda}{2} \sum_{j=0}^p \beta_j^2 \\ & \quad + n^{-1} \sum_{i=1}^n \left\{ (1 - \alpha_i) \log(1 - \alpha_i) + \alpha_i \log(\alpha_i) \right\} \\ & = \min_{\alpha \in (\Theta_{\alpha, \lambda}^{\mathbf{x}})^n} \left( \max_{\beta_0 \in \Theta_{\beta, \lambda}^{\mathbf{x}}, \beta \in (\Theta_{\beta, \lambda}^{\mathbf{x}})^p} n^{-1} \sum_{i=1}^n \left\{ y_i (\beta_0 + \mathbf{x}_i^\top \beta) \alpha_i \right\} - \frac{\lambda}{2} \sum_{j=0}^p \beta_j^2 \right) \\ & \quad + n^{-1} \sum_{i=1}^n \left\{ (1 - \alpha_i) \log(1 - \alpha_i) + \alpha_i \log(\alpha_i) \right\}. \end{aligned}$$

Now the inner maximization program can be solved exactly, since,  
 for any  $\alpha \in (\Theta_{\alpha, \lambda}^{\mathbf{x}})^n$ , the maximum of  $n^{-1} \sum_{i=1}^n \{y_i (\beta_0 + \mathbf{x}_i^\top \beta) \alpha_i\} -$   
 $(\lambda/2) \sum_{j=0}^p \beta_j^2$  is achieved at

$$\begin{bmatrix} \check{\beta}_0^\lambda(\alpha) \\ \check{\beta}^\lambda(\alpha) \end{bmatrix} = (n\lambda)^{-1} \sum_{i=1}^n y_i \alpha_i \begin{bmatrix} 1 \\ \mathbf{x}_i \end{bmatrix}.$$

82 Since it can readily be verified that  $(\check{\beta}_0^\lambda(\alpha), \check{\beta}^\lambda(\alpha))$  lies in the interior of  
 83  $(\Theta_{\beta, \lambda}^{\mathbf{x}})^{p+1}$  we therefore have

$$\begin{aligned} & \max_{\beta_0 \in \Theta_{\beta, \lambda}^{\mathbf{x}}, \beta \in (\Theta_{\beta, \lambda}^{\mathbf{x}})^p} n^{-1} \sum_{i=1}^n \left\{ y_i (\beta_0 + \mathbf{x}_i^\top \beta) (1 - \alpha_i) \right\} - \frac{\lambda}{2} \sum_{j=0}^p \beta_j^2 \\ & = \frac{\lambda}{2} \sum_{j=0}^p \{ \check{\beta}_j^\lambda(\alpha) \}^2 = \frac{1}{2\lambda n^2} \sum_{i=1}^n \sum_{j=1}^n \alpha_i \alpha_j y_i y_j (\mathbf{x}_i^\top \mathbf{x}_j + 1). \end{aligned}$$

84 This concludes the proof of the lemma.  $\square$

85 Recall the maximization problem defined in (2) in the manuscript,  
86 namely,

$$\max_{\beta_0 \in \mathbb{R}, \boldsymbol{\beta} \in \mathbb{R}^p} \left( l_n^\lambda(\beta_0, \boldsymbol{\beta}) = n^{-1} \sum_{i=1}^n \log \left[ \frac{1}{1 + \exp\{-y_i(\beta_0 + \mathbf{x}_i^\top \boldsymbol{\beta})\}} \right] - \frac{\lambda}{2} \left[ (\beta_0 + \sum_{j=1}^p \beta_j \mu_{n,j})^2 + \sum_{j=1}^p \beta_j^2 s_{n,j}^2 \right] \right),$$

87 and recall from the manuscript that its solution is denoted by  $(\hat{\beta}_0^\lambda, \hat{\boldsymbol{\beta}}^\lambda)$ .

88 Also, recall the definition of  $J^\lambda(\boldsymbol{\alpha})$  in (3) in the manuscript, i.e., that

$$J^\lambda(\boldsymbol{\alpha}) = \frac{1}{2\lambda n^2} \boldsymbol{\alpha}^\top \text{diag}(\mathbf{y}) \left( \sum_{k=1}^K \boldsymbol{\kappa}^{(k)} + \mathbf{1}_n \mathbf{1}_n^\top \right) \text{diag}(\mathbf{y}) \boldsymbol{\alpha} + \frac{1}{n} \sum_{i=1}^n \left\{ (1 - \alpha_i) \log(1 - \alpha_i) + \alpha_i \log(\alpha_i) \right\},$$

89 where  $\boldsymbol{\kappa}^{(k)} = \mathbf{X}_{cs}^{(k)} (\mathbf{X}_{cs}^{(k)})^\top$ .

90 The following proposition proves the assertion in Methods 4.2.2 that  
91 the solution  $(\hat{\beta}_0^\lambda, \hat{\boldsymbol{\beta}}^\lambda)$  can be computed using Equation (11) in the  
92 manuscript.

93 **Proposition S1.** *Assume that  $s_{n,j} > 0$  for all  $j \in \{1, \dots, p\}$ . Then,*  
94  *$(\hat{\beta}_0^\lambda, \hat{\boldsymbol{\beta}}^\lambda)$  satisfies*

$$\hat{\beta}_0^\lambda = \frac{1}{n\lambda} \sum_{i=1}^n \hat{\alpha}_i^\lambda y_i - \sum_{j=1}^p \mu_{n,j} \hat{\beta}_j^\lambda,$$

$$\hat{\boldsymbol{\beta}}^\lambda = \text{diag}(s_{n,1}, \dots, s_{n,p})^{-1} \left( \frac{1}{n\lambda} \sum_{i=1}^n \hat{\alpha}_i^\lambda y_i \mathbf{x}_{i,cs} \right),$$

95 where  $\hat{\boldsymbol{\alpha}}^\lambda := [\hat{\alpha}_1^\lambda, \dots, \hat{\alpha}_n^\lambda]^\top \in (0, 1)^n$  is the unique minimizer of  $J^\lambda(\boldsymbol{\alpha})$   
96 over  $(0, 1)^n$ .



97 *Proof.* Since, for all  $i \in \{1, \dots, n\}$  we have

$$\begin{aligned}\beta_0 + \mathbf{x}_i^\top \boldsymbol{\beta} &= \beta_0 + \sum_{j=1}^p x_{ij} \beta_j \\ &= \left( \beta_0 + \sum_{j=1}^p \mu_{n,j} \beta_j \right) + \sum_{j=1}^p \left( \frac{x_{ij} - \mu_{n,j}}{s_{n,j}} \right) (\beta_j s_{n,j}) \\ &= (\beta_0 + \hat{\boldsymbol{\mu}}^\top \boldsymbol{\beta}) + \mathbf{x}_{i,\text{cs}}^\top \hat{\boldsymbol{\Sigma}} \boldsymbol{\beta},\end{aligned}$$

98 where we have introduced

$$\hat{\boldsymbol{\mu}} = [\mu_{n,1}, \dots, \mu_{n,p}]^\top, \quad \hat{\boldsymbol{\Sigma}} = \text{diag}([s_{n,1}, \dots, s_{n,p}]^\top), \quad (\text{S7})$$

99 it follows upon adopting the re-parametrization  $(\beta_0^\circ, \boldsymbol{\beta}^\circ) \equiv (\beta_0 +$   
100  $\hat{\boldsymbol{\mu}}^\top \boldsymbol{\beta}, \hat{\boldsymbol{\Sigma}} \boldsymbol{\beta})$  that

$$\begin{aligned}& \max_{\beta_0 \in \mathbb{R}, \boldsymbol{\beta} \in \mathbb{R}^p} l_n^\lambda(\beta_0, \boldsymbol{\beta}) \\ &= \max_{\beta_0^\circ \in \mathbb{R}, \boldsymbol{\beta}^\circ \in \mathbb{R}^p} \left( n^{-1} \sum_{i=1}^n \log \left[ \frac{1}{1 + \exp\{-y_i(\beta_0^\circ + \mathbf{x}_{i,\text{cs}}^\top \boldsymbol{\beta}^\circ)\}} \right] - \frac{\lambda}{2} \sum_{j=0}^p (\beta_j^\circ)^2 \right).\end{aligned}$$

The maximization problem on the last line of the previous equation fits the framework of Lemma S1, which implies that its unique maximizer, denoted by  $(\check{\beta}_0^\lambda, \check{\boldsymbol{\beta}}^\lambda)$ , satisfies

$$\begin{bmatrix} \check{\beta}_0^\lambda \\ \check{\boldsymbol{\beta}}^\lambda \end{bmatrix} = (n\lambda)^{-1} \sum_{i=1}^n y_i \hat{\boldsymbol{\alpha}}_i^\lambda \begin{bmatrix} 1 \\ \mathbf{x}_{i,\text{cs}} \end{bmatrix},$$

101 where  $\hat{\boldsymbol{\alpha}}^\lambda = (\hat{\alpha}_1^\lambda, \dots, \hat{\alpha}_n^\lambda)^\top \in (0, 1)^n$  is the unique solution to the following  
102 minimization problem:

$$\begin{aligned}& \min_{\boldsymbol{\alpha} \in (0,1)^n} \left( \frac{1}{n} \sum_{i=1}^n \left\{ (1 - \alpha_i) \log(1 - \alpha_i) + \alpha_i \log(\alpha_i) \right\} \right. \\ & \quad \left. + \frac{1}{2\lambda n^2} \sum_{i=1}^n \sum_{j=1}^n \alpha_i \alpha_j y_i y_j (\mathbf{x}_{i,\text{cs}}^\top \mathbf{x}_{j,\text{cs}} + 1) \right) \\ &= \min_{\boldsymbol{\alpha} \in (0,1)^n} J^\lambda(\boldsymbol{\alpha}),\end{aligned}$$

103 where, in applying Lemma S1, we replaced the set  $\Theta_{\alpha,\lambda}^{\mathbf{X}}$  by  $(0, 1)$ .

104 The proof of the proposition follows from the fact that since the  
 105 bijective nature of the reparametrization implies

$$\begin{bmatrix} \widehat{\beta}_0^\lambda \\ \widehat{\beta}^\lambda \end{bmatrix} = \begin{bmatrix} \check{\beta}_0^\lambda - \widehat{\boldsymbol{\mu}}^\top \widehat{\beta}^\lambda \\ \widehat{\boldsymbol{\Sigma}}^{-1} \check{\beta}^\lambda \end{bmatrix}, \quad (\text{S8})$$

we have

$$\widehat{\beta}_0^\lambda = (n\lambda)^{-1} \sum_{i=1}^n y_i \widehat{\alpha}_i^\lambda - \widehat{\boldsymbol{\mu}}^\top \widehat{\beta}^\lambda, \quad \widehat{\beta}^\lambda = \widehat{\boldsymbol{\Sigma}}^{-1} \left( (n\lambda)^{-1} \sum_{i=1}^n y_i \widehat{\alpha}_i^\lambda \mathbf{x}_{i,\text{cs}} \right).$$

106

□

107 The following lemma establishes that, if the unpenalized maximum  
 108 likelihood estimate  $(\widehat{\beta}_0, \widehat{\beta})$  exists and is unique, then it is close to the  
 109 penalized estimate  $(\check{\beta}_0^\lambda, \check{\beta}^\lambda)$  defined in Lemma S1 for sufficiently small  
 110  $\lambda$ . It is well known [3] that if the columns of the matrix  $\mathbf{X}$  are linearly  
 111 independent, and also linearly independent of the vector  $\mathbf{1}_n$ , then the  
 112 Hessian  $\nabla_{\beta_0, \beta}^2 \ell_n(\beta_0, \beta)$  is strictly negative definite, implying that the log-  
 113 likelihood function  $\ell_n(\beta_0, \beta)$  is strictly concave. In this case, if a maximizer  
 114 exists for the problem  $\max_{\beta_0 \in \mathbb{R}, \beta \in \mathbb{R}^p} \ell_n(\beta_0, \beta)$  then it must be unique, and  
 115 it must be a stationary point of  $\nabla_{\beta_0, \beta} \ell_n(\beta_0, \beta)$ . The existence of such a  
 116 solution is guaranteed when the response vector  $\mathbf{y}$  is not separable [4].  
 117 Specifically,  $\mathbf{y}$  is said to be separable if there exists  $(\beta_0, \beta)$  such that  
 118  $y_i(\beta_0 + \mathbf{x}_i^\top \beta) > 0$  for all  $i \in \{1, \dots, n\}$ . In the presence of separability,  
 119 the log-likelihood function increases indefinitely, and a finite maximum  
 120 likelihood estimate does not exist.

121 In what follows, for any positive definite matrix  $\mathbf{A}$ , let  $\iota_{\min}(\mathbf{A})$  denote  
 122 its smallest eigen value.

123 **Lemma S2.** *Let  $(y_1, \mathbf{x}_1), \dots, (y_n, \mathbf{x}_n) \in \{-1, 1\} \times \mathbb{R}^p$  be such that the*  
 124 *matrix  $[\mathbf{1}_n, \mathbf{x}_1, \dots, \mathbf{x}_n]^\top$  has full column rank and such that  $\mathbf{y}$  is not sep-*  
 125 *arable. Then, the unique solution  $(\check{\beta}_0^\lambda, \check{\beta}^\lambda)$  to the maximization problem*  
 126  *$\max_{\beta_0 \in \mathbb{R}, \beta \in \mathbb{R}^p} \check{l}_n^\lambda(\beta_0, \beta)$ , with  $\check{l}_n^\lambda$  as defined in Lemma S1, satisfies*

$$\begin{aligned} & \left\| \begin{bmatrix} \check{\beta}_0^\lambda - \widehat{\beta}_0 \\ \check{\beta}^\lambda - \widehat{\beta} \end{bmatrix} \right\|_\infty \\ & \leq \iota_{\min} \{ \mathcal{I}(\widehat{\beta}_0, \widehat{\beta}) + \lambda \mathbf{I}_{p+1} \}^{-1} \end{aligned}$$

$$\times \left\{ \left\| \begin{bmatrix} \check{\beta}_0^\lambda - \widehat{\beta}_0 \\ \check{\beta}^\lambda - \widehat{\beta} \end{bmatrix} \right\|_\infty^2 n^{-1} \sum_{i=1}^n (\|\mathbf{x}_i\|_\infty + 1)^3 + \lambda \left\| \begin{bmatrix} \widehat{\beta}_0 \\ \widehat{\beta} \end{bmatrix} \right\|_\infty \right\}.$$

127 *Proof of Lemma S2.* Since  $(\check{\beta}_0^\lambda, \check{\beta}^\lambda)$  is a stationary point of  $\check{l}_n^\lambda(\beta_0, \beta)$ , we  
 128 have  $0 = \nabla_{\beta_0, \beta} \check{l}_n^\lambda(\check{\beta}_0^\lambda, \check{\beta}^\lambda) = \nabla_{\beta_0, \beta} \ell_n(\check{\beta}_0^\lambda, \check{\beta}^\lambda) - \lambda [\check{\beta}_0^\lambda, (\check{\beta}^\lambda)^\top]^\top$ , and therefore

$$\|\nabla_{\beta_0, \beta} \ell_n(\check{\beta}_0^\lambda, \check{\beta}^\lambda)\|_2^2 = \lambda^2 \sum_{j=0}^p (\check{\beta}_j^\lambda)^2 \leq \lambda^2 \sum_{j=0}^p (\widehat{\beta}_j)^2.$$

129 Since  $(\widehat{\beta}_0, \widehat{\beta})$  does not depend on  $\lambda$  and is finite, we conclude that as  
 130  $\lambda \rightarrow 0$ ,  $\|\nabla_{\beta_0, \beta} \ell_n(\check{\beta}_0^\lambda, \check{\beta}^\lambda)\|_2^2 \rightarrow 0$ , which implies that  $(\check{\beta}_0^\lambda, \check{\beta}^\lambda) \rightarrow (\widehat{\beta}_0, \widehat{\beta})$  as  
 131  $\lambda \rightarrow 0$  since the maximum of  $\ell_n(\beta_0, \beta)$  is unique.

132 Now since  $\nabla_{\beta_0, \beta} \check{l}_n^\lambda(\check{\beta}_0^\lambda, \check{\beta}^\lambda) = 0$  we have

$$\begin{aligned} \lambda \begin{bmatrix} \check{\beta}_0^\lambda \\ \check{\beta}^\lambda \end{bmatrix} &= n^{-1} \sum_{i=1}^n \frac{y_i}{1 + \exp\{y_i(\check{\beta}_0^\lambda + \mathbf{x}_i^\top \check{\beta}^\lambda)\}} \begin{bmatrix} 1 \\ \mathbf{x}_i \end{bmatrix} \\ &= n^{-1} \sum_{i=1}^n y_i \left[ \frac{1}{1 + \exp\{y_i(\check{\beta}_0^\lambda + \mathbf{x}_i^\top \check{\beta}^\lambda)\}} \right. \\ &\quad \left. - \frac{1}{1 + \exp\{y_i(\widehat{\beta}_0 + \mathbf{x}_i^\top \widehat{\beta})\}} \right] \begin{bmatrix} 1 \\ \mathbf{x}_i \end{bmatrix}, \quad (\text{S9}) \end{aligned}$$

133 where, to obtain the second line, we used the fact that  $\nabla_{\beta_0, \beta} \ell_n(\widehat{\beta}_0, \widehat{\beta}) = 0$ .

134 As for any  $x, y \in \mathbb{R}$  a Taylor expansion of order two shows that

$$\begin{aligned} \left| \frac{1}{1 + e^x} - \frac{1}{1 + e^y} + \frac{e^y}{(1 + e^y)^2} (x - y) \right| \\ \leq (x - y)^2 \sup_{z \in \mathbb{R}} \left| \left\{ \frac{e^z}{(1 + e^z)^2} \right\} \left( \frac{e^z - 1}{1 + e^z} \right) \right| \leq (x - y)^2, \end{aligned}$$

135 and since (S9) implies

$$\begin{aligned} \lambda \begin{bmatrix} \check{\beta}_0^\lambda \\ \check{\beta}^\lambda \end{bmatrix} + n^{-1} \sum_{i=1}^n \frac{\exp\{y_i(\widehat{\beta}_0 + \mathbf{x}_i^\top \widehat{\beta})\}}{[1 + \exp\{y_i(\widehat{\beta}_0 + \mathbf{x}_i^\top \widehat{\beta})\}]^2} \begin{bmatrix} 1 & \mathbf{x}_i^\top \\ \mathbf{x}_i & \mathbf{x}_i \mathbf{x}_i^\top \end{bmatrix} \begin{bmatrix} \check{\beta}_0^\lambda - \widehat{\beta}_0 \\ \check{\beta}^\lambda - \widehat{\beta} \end{bmatrix} \\ = \lambda \begin{bmatrix} \check{\beta}_0^\lambda \\ \check{\beta}^\lambda \end{bmatrix} \end{aligned}$$

$$\begin{aligned}
& + n^{-1} \sum_{i=1}^n \frac{\exp\{y_i(\hat{\beta}_0 + \mathbf{x}_i^\top \hat{\beta})\}}{[1 + \exp\{y_i(\hat{\beta}_0 + \mathbf{x}_i^\top \hat{\beta})\}]^2} [(\check{\beta}_0^\lambda - \hat{\beta}_0) + \mathbf{x}_i^\top (\check{\beta}^\lambda - \hat{\beta})] \begin{bmatrix} 1 \\ \mathbf{x}_i \end{bmatrix} \\
& = n^{-1} \sum_{i=1}^n y_i \left\{ \frac{1}{1 + \exp\{y_i(\check{\beta}_0^\lambda + \mathbf{x}_i^\top \check{\beta}^\lambda)\}} - \frac{1}{1 + \exp\{y_i(\hat{\beta}_0 + \mathbf{x}_i^\top \hat{\beta})\}} \right. \\
& \quad \left. + \frac{\exp\{y_i(\hat{\beta}_0 + \mathbf{x}_i^\top \hat{\beta})\}}{[1 + \exp\{y_i(\hat{\beta}_0 + \mathbf{x}_i^\top \hat{\beta})\}]^2} \left[ y_i \{(\check{\beta}_0^\lambda - \hat{\beta}_0) + \mathbf{x}_i^\top (\check{\beta}^\lambda - \hat{\beta})\} \right] \right\} \begin{bmatrix} 1 \\ \mathbf{x}_i \end{bmatrix},
\end{aligned}$$

we conclude that

$$\begin{aligned}
& \left\| \lambda \begin{bmatrix} \check{\beta}_0^\lambda \\ \check{\beta}^\lambda \end{bmatrix} + n^{-1} \sum_{i=1}^n \frac{\exp\{y_i(\hat{\beta}_0 + \mathbf{x}_i^\top \hat{\beta})\}}{[1 + \exp\{y_i(\hat{\beta}_0 + \mathbf{x}_i^\top \hat{\beta})\}]^2} \begin{bmatrix} 1 & \mathbf{x}_i^\top \\ \mathbf{x}_i & \mathbf{x}_i \mathbf{x}_i^\top \end{bmatrix} \begin{bmatrix} \check{\beta}_0^\lambda - \hat{\beta}_0 \\ \check{\beta}^\lambda - \hat{\beta} \end{bmatrix} \right\|_\infty \\
& \leq n^{-1} \sum_{i=1}^n \left[ (\check{\beta}_0^\lambda - \hat{\beta}_0) + \mathbf{x}_i^\top (\check{\beta}^\lambda - \hat{\beta}) \right]^2 (\|\mathbf{x}_i\|_\infty + 1) \\
& \leq \left\| \begin{bmatrix} \check{\beta}_0^\lambda - \hat{\beta}_0 \\ \check{\beta}^\lambda - \hat{\beta} \end{bmatrix} \right\|_\infty^2 n^{-1} \sum_{i=1}^n (\|\mathbf{x}_i\|_\infty + 1)^3.
\end{aligned}$$

Recalling the definition of  $\mathcal{I}(\beta_0, \beta)$  above the statement of the lemma, by rearranging the terms and applying the triangle inequality, we obtain from the last equation that

$$\begin{aligned}
& \left\| \left( \mathcal{I}(\hat{\beta}_0, \hat{\beta}) + \lambda \mathbf{I}_{p+1} \right) \begin{bmatrix} \check{\beta}_0^\lambda - \hat{\beta}_0 \\ \check{\beta}^\lambda - \hat{\beta} \end{bmatrix} \right\|_\infty \\
& \leq \left\| \begin{bmatrix} \check{\beta}_0^\lambda - \hat{\beta}_0 \\ \check{\beta}^\lambda - \hat{\beta} \end{bmatrix} \right\|_\infty^2 n^{-1} \sum_{i=1}^n (\|\mathbf{x}_i\|_\infty + 1)^3 + \lambda \left\| \begin{bmatrix} \hat{\beta}_0 \\ \hat{\beta} \end{bmatrix} \right\|_\infty.
\end{aligned}$$

The result follows from the fact that for any positive matrix  $\mathbf{A}$ ,  $\|\mathbf{A}\mathbf{x}\| \geq \iota_{\min}(\mathbf{A})\|\mathbf{x}\|$ .  $\square$

**Remark S1.** Consider  $(\hat{\beta}_0^\lambda, \hat{\beta}^\lambda)$ , and let  $(\check{\beta}_0^\lambda, \check{\beta}^\lambda)$  be defined as in the proof of Proposition S1. Also, let  $(\check{\beta}_0, \check{\beta})$  and  $(\hat{\beta}_0, \hat{\beta})$  be the maximum likelihood estimates that solves the log-likelihood maximization problem based on, respectively, the centered and scaled covariate data  $\mathbf{x}_{1,cs}, \dots, \mathbf{x}_{n,cs}$ , and the covariate data in their original scale  $\mathbf{x}_1, \dots, \mathbf{x}_n$ . Using arguments that are identical to the ones used in the proof of Proposition S1, it is

148 straightforward to deduce that

$$\begin{bmatrix} \widehat{\beta}_0 \\ \widehat{\beta} \end{bmatrix} = \begin{bmatrix} \check{\beta}_0 - \widehat{\mu}^\top \check{\beta} \\ \widehat{\Sigma}^{-1} \check{\beta} \end{bmatrix}.$$

149 Combining the last equation to (S8) implies

$$\begin{aligned} \max_{j \in \{0, \dots, p\}} |\widehat{\beta}_j^\lambda - \widehat{\beta}_j| &\leq \left(1 + \frac{p(\|\widehat{\mu}\|_\infty + 1)}{\min_{j \in \{1, \dots, p\}} s_{n,j}}\right) \max_{j \in \{0, \dots, p\}} |\check{\beta}_j^\lambda - \check{\beta}_j| \\ &:= \kappa_{\mathbf{X}} \max_{j \in \{0, \dots, p\}} |\check{\beta}_j^\lambda - \check{\beta}_j|. \end{aligned}$$

150 Since  $(\check{\beta}_0^\lambda, \check{\beta}^\lambda)$  and  $(\check{\beta}_0, \check{\beta})$  fit the framework of Lemma S2, we have, under  
151 the lemma's assumptions that

$$\begin{aligned} &\left\| \begin{bmatrix} \check{\beta}_0^\lambda - \check{\beta}_0 \\ \check{\beta}^\lambda - \check{\beta} \end{bmatrix} \right\|_\infty \\ &\leq \iota_{\min} \{ \check{\mathcal{I}}(\check{\beta}_0, \check{\beta}) + \lambda \mathbf{I}_{p+1} \}^{-1} \\ &\quad \times \left\{ \left\| \begin{bmatrix} \check{\beta}_0^\lambda - \check{\beta}_0 \\ \check{\beta}^\lambda - \check{\beta} \end{bmatrix} \right\|_\infty^2 n^{-1} \sum_{i=1}^n (\|\mathbf{x}_{i,cs}\|_\infty + 1)^3 + \lambda \left\| \begin{bmatrix} \check{\beta}_0 \\ \check{\beta} \end{bmatrix} \right\|_\infty \right\}, \end{aligned}$$

152 with  $\check{\mathcal{I}}(\beta_0, \beta)$  a version of  $\mathcal{I}(\beta_0, \beta)$  (see (S1)) where the original data are  
153 replaced by the centered and scaled data, given by

$$\check{\mathcal{I}}(\beta_0, \beta) = \frac{1}{n} \sum_{i=1}^n \frac{\exp\{y_i(\beta_0 + \mathbf{x}_{i,cs}^\top \beta)\}}{[1 + \exp\{y_i(\beta_0 + \mathbf{x}_{i,cs}^\top \beta)\}]^2} \begin{bmatrix} 1 & \mathbf{x}_{i,cs}^\top \\ \mathbf{x}_{i,cs} & \mathbf{x}_{i,cs} \mathbf{x}_{i,cs}^\top \end{bmatrix}.$$

Since the inequality  $\frac{\|\mathbf{x}_{i,cs}\|_\infty}{n^{-1} \sum_{i=1}^n (\|\mathbf{x}_{i,cs}\|_\infty + 1)^3} \leq \frac{\kappa_{\mathbf{X}} \|\mathbf{x}\|_i}{\kappa_{\mathbf{X}}^3 n^{-1} \sum_{i=1}^n (\|\mathbf{x}_i\|_\infty + 2)^3}$  implies  
and as  $\mathbf{T}_n \mathcal{I}(\widehat{\beta}_0, \widehat{\beta}) \mathbf{T}_n^\top = \check{\mathcal{I}}(\check{\beta}_0, \check{\beta})$ , with

$$\mathbf{T}_n = \begin{bmatrix} 1 & \mathbf{0}^\top \\ -\widehat{\Sigma}^{-1} \widehat{\mu} & \widehat{\Sigma}^{-1} \end{bmatrix}, \quad \text{which ensures} \quad \mathbf{T}_n \begin{bmatrix} 1 \\ \mathbf{x}_i \end{bmatrix} = \begin{bmatrix} 1 \\ \mathbf{x}_{i,cs} \end{bmatrix},$$

154 then, we conclude that

$$\left\| \begin{bmatrix} \widehat{\beta}_0^\lambda - \widehat{\beta}_0 \\ \widehat{\beta}^\lambda - \widehat{\beta} \end{bmatrix} \right\|_\infty \leq \kappa_{\mathbf{X}}^5 \iota_{\min} \{ \mathbf{T}_n \mathcal{I}(\widehat{\beta}_0, \widehat{\beta}) \mathbf{T}_n^\top + \lambda \mathbf{I}_{p+1} \}^{-1}$$

$$\times \left\{ \left\| \left( n^{-1} \sum_{i=1}^n (\|\mathbf{x}_i\|_\infty + 2)^3 \right) \begin{bmatrix} \hat{\beta}_0^\lambda - \hat{\beta}_0 \\ \hat{\beta}^\lambda - \hat{\beta} \end{bmatrix} \right\|_\infty^2 + \lambda \left\| \begin{bmatrix} \hat{\beta}_0 \\ \hat{\beta} \end{bmatrix} \right\|_\infty \right\}.$$

## 155 **Supplementary Methods 2**    **Auxiliary results** 156 **related to the** 157 **asymptotic normality** 158 **of $\hat{\beta}^\lambda$ and computation** 159 **of standard errors**

### 160 **2.1 Asymptotic normality of $\hat{\beta}^\lambda$ and consistency of standard** 161 **error estimates**

162 Recall from Results 2.1 that we assume a binary random variable  $Y \in$   
163  $\{-1, 1\}$  and a random vector of covariates  $\mathbf{X} = [X_1, \dots, X_p]^\top \in \mathbb{R}^p$  fol-  
164 lowing a logistic regression model. In this model, there exists an unknown  
165 parameter vector  $\beta_{0\star} \in \mathbb{R}, \beta_\star \in \mathbb{R}^p$  such that

$$\mathbb{P}(Y = y \mid \mathbf{X} = \mathbf{x}) = \frac{1}{1 + \exp\{-y(\beta_{0\star} + \mathbf{x}^\top \beta_\star)\}}. \quad (\text{S10})$$

166 Let  $(Y_1, \mathbf{X}_1), \dots, (Y_n, \mathbf{X}_n)$  be i.i.d. random variables satisfying the  
167 model in (S10). Throughout this section, we use  $\ell_n(\beta)$  and  $l_n^\lambda(\beta)$ , as  
168 defined in (9) and (2), respectively, where the  $(y_i, \mathbf{x}_i)$ 's in their defini-  
169 tions are replaced here by the random variables  $(Y_i, \mathbf{X}_i)$ . Specifically, we  
170 consider

$$\ell_n(\beta_0, \beta) = n^{-1} \sum_{i=1}^n \log \left( \frac{1}{1 + \exp\{-Y_i(\beta_0 + \mathbf{X}_i^\top \beta)\}} \right). \quad (\text{S11})$$

171 and

$$\begin{aligned} l_n^\lambda(\beta_0, \beta) = & n^{-1} \sum_{i=1}^n \log \left( \frac{1}{1 + \exp\{-Y_i(\beta_0 + \mathbf{X}_i^\top \beta)\}} \right) \\ & - \frac{\lambda}{2} \left[ (\beta_0 + \sum_{j=1}^p \beta_j \mu_{n,j})^2 + \sum_{j=1}^p \beta_j^2 s_{n,j}^2 \right], \end{aligned} \quad (\text{S12})$$

172 with  $\mu_{n,j} = n^{-1} \sum_{i=1}^n X_{ij}$  and  $s_{n,j}^2 = (n-1)^{-1} \sum_{i=1}^n (X_{ij} - \mu_{n,j})^2$ .

173 Throughout this section, we also consider a version of  $\hat{\beta}^\lambda$  computed  
174 with the random variables  $(Y_1, \mathbf{X}_1), \dots, (Y_n, \mathbf{X}_n)$ . That is, we define the

175 estimator  $\hat{\beta}^\lambda = \arg \max_{\beta \in \mathbb{R}} l_n^\lambda(\beta)$ , with  $l_n^\lambda(\beta)$  as in (S12) (recall from  
 176 Lemma S1 that when  $\lambda > 0$  the function  $l_n^\lambda(\beta)$  is strongly concave and  
 177 has a unique maximizer).

178 We also consider a version of  $(\hat{\beta}_0, \hat{\beta})$  computed from the random vari-  
 179 ables  $(Y_1, \mathbf{X}_1), \dots, (Y_n, \mathbf{X}_n)$ . That is, we define the maximum likelihood  
 180 estimator as  $(\hat{\beta}_0, \hat{\beta}) = \arg \max_{\beta_0 \in \mathbb{R}, \beta \in \mathbb{R}^p} \ell_n(\beta_0, \beta)$ . For sufficiently large  $n$ ,  
 181 this estimator exists with probability one, since for any finite  $(\hat{\beta}_0, \hat{\beta})$ , the  
 182 response vector  $\mathbf{Y}$  will be non-separable with probability one when  $n$  is  
 183 large enough.

184 Likewise, we consider of version of  $\mathcal{I}(\beta_0, \beta)$  at (S1), where the  $(y_i, \mathbf{x}_i)$ 's  
 185 are replaced here by the random variables  $(Y_i, \mathbf{X}_i)$ .

186 The following lemma establishes that, if  $(\hat{\beta}_0, \hat{\beta})$  converges in probabil-  
 187 ity to the true  $(\beta_{0*}, \beta_*)$ , then  $(\hat{\beta}_0^\lambda, \hat{\beta}^\lambda) = (\hat{\beta}_0, \hat{\beta}) + O_{\mathbb{P}}(\lambda)$ .

**Lemma S3.** *Let  $(Y_1, \mathbf{X}_1), \dots, (Y_n, \mathbf{X}_n)$  be i.i.d. random variables satis-  
 fying the model in (S10). Assume that the matrix*

$$\mathbb{E} \left( \begin{bmatrix} 1 & \mathbf{X}_1^\top \\ \mathbf{X}_1 & \mathbf{X}_1 \mathbf{X}_1^\top \end{bmatrix} \right)$$

188 *is invertible, and that  $\mathbb{E}\{\|\mathbf{X}_1\|_\infty^2\} < \infty$ . Then, if  $\lambda \rightarrow 0$  and  $\max(|\hat{\beta}_0 -$   
 189  $\beta_{0*}|, \|\hat{\beta} - \beta_*\|_\infty) = o_{\mathbb{P}}(1)$  as  $n \rightarrow \infty$ , it follows that  $\max(|\hat{\beta}_0^\lambda - \hat{\beta}_0|, \|\hat{\beta}^\lambda -$   
 190  $\hat{\beta}\|_\infty) = O_{\mathbb{P}}(\lambda)$  as  $n \rightarrow \infty$ .*

191 *Proof of Lemma S3.* We start by showing that

$$\max(|\hat{\beta}_0^\lambda - \hat{\beta}_0|, \|\hat{\beta}^\lambda - \hat{\beta}\|_\infty) = o_{\mathbb{P}}(1) \quad \text{as } n \rightarrow \infty. \quad (\text{S13})$$

192 To this end, first note that under our conditions,  $(\hat{\beta}_0, \hat{\beta})$  exists and is  
 193 unique with probability one. Since  $(\hat{\beta}_0^\lambda, \hat{\beta}^\lambda)$  and  $(\hat{\beta}_0, \hat{\beta})$  are respectively  
 194 the maximizers of  $l_n^\lambda(\beta_0, \beta)$  and  $\ell_n(\beta_0, \beta)$ , we have

$$l_n^\lambda(\hat{\beta}_0^\lambda, \hat{\beta}^\lambda) > l_n^\lambda(\hat{\beta}_0, \hat{\beta}) \quad \text{and} \quad \ell_n(\hat{\beta}_0^\lambda, \hat{\beta}^\lambda) < \ell_n(\hat{\beta}_0, \hat{\beta}). \quad (\text{S14})$$

As

$$l_n^\lambda(\beta_0, \beta) = \ell_n(\beta_0, \beta) - \frac{\lambda}{2} [(\beta_0 + \hat{\mu}^\top \beta)^2 + \beta^\top \hat{\Sigma}^2 \beta],$$

where  $\hat{\boldsymbol{\mu}}$  and  $\hat{\boldsymbol{\Sigma}}$  are defined as in (S7) with the  $\mathbf{x}_i$ 's in the definition of the quantities  $\mu_{n,j}$  and  $s_{n,j}$  replaced here by the random  $\mathbf{X}_i$ 's here, we have

$$\begin{aligned} 0 &< l_n^\lambda(\hat{\beta}_0^\lambda, \hat{\boldsymbol{\beta}}^\lambda) - l_n^\lambda(\hat{\beta}_0, \hat{\boldsymbol{\beta}}) \\ &= \{\ell_n(\hat{\beta}_0^\lambda, \hat{\boldsymbol{\beta}}^\lambda) - \ell_n(\hat{\beta}_0, \hat{\boldsymbol{\beta}})\} \\ &\quad - \frac{\lambda}{2} \left( [(\hat{\beta}_0^\lambda + \hat{\boldsymbol{\mu}}^\top \hat{\boldsymbol{\beta}}^\lambda)^2 + (\hat{\boldsymbol{\beta}}^\lambda)^\top \hat{\boldsymbol{\Sigma}}^2 \hat{\boldsymbol{\beta}}^\lambda] - [(\hat{\beta}_0 + \hat{\boldsymbol{\mu}}^\top \hat{\boldsymbol{\beta}})^2 + \hat{\boldsymbol{\beta}}^\top \hat{\boldsymbol{\Sigma}}^2 \hat{\boldsymbol{\beta}}] \right). \end{aligned}$$

This implies that

$$\begin{aligned} \frac{\lambda}{2} \left( [(\hat{\beta}_0 + \hat{\boldsymbol{\mu}}^\top \hat{\boldsymbol{\beta}})^2 + \hat{\boldsymbol{\beta}}^\top \hat{\boldsymbol{\Sigma}}^2 \hat{\boldsymbol{\beta}}] - [(\hat{\beta}_0^\lambda + \hat{\boldsymbol{\mu}}^\top \hat{\boldsymbol{\beta}}^\lambda)^2 + (\hat{\boldsymbol{\beta}}^\lambda)^\top \hat{\boldsymbol{\Sigma}}^2 \hat{\boldsymbol{\beta}}^\lambda] \right) \\ > \ell_n(\hat{\beta}_0, \hat{\boldsymbol{\beta}}) - \ell_n(\hat{\beta}_0^\lambda, \hat{\boldsymbol{\beta}}^\lambda) > 0. \end{aligned}$$

Since we have assumed that  $\max(|\hat{\beta}_0 - \beta_{0*}|, \|\hat{\boldsymbol{\beta}} - \boldsymbol{\beta}_*\|_\infty) = o_{\mathbb{P}}(1)$  as  $n \rightarrow \infty$ , as under our conditions the weak law of large numbers ensures  $\mu_{n,j} = \mathbb{E}(X_j) + o_{\mathbb{P}}(1)$ , and since the weak law of large numbers combined with the continuous mapping theorem implies  $s_{n,j} = \sqrt{\text{Var}(X_j)} + o_{\mathbb{P}}(1)$ , we conclude from the last equation display that as  $n \rightarrow \infty$ ,

$$[(\hat{\beta}_0^\lambda + \hat{\boldsymbol{\mu}}^\top \hat{\boldsymbol{\beta}}^\lambda)^2 + (\hat{\boldsymbol{\beta}}^\lambda)^\top \hat{\boldsymbol{\Sigma}}^2 \hat{\boldsymbol{\beta}}^\lambda] \leq [(\beta_{0*} + \boldsymbol{\mu}^\top \boldsymbol{\beta}_*)^2 + (\boldsymbol{\beta}_*)^\top \boldsymbol{\Sigma}^2 \boldsymbol{\beta}_*] + o_{\mathbb{P}}(1),$$

where  $\boldsymbol{\mu} = [\mathbb{E}(X_1), \dots, \mathbb{E}(X_p)]^\top$  and  $\boldsymbol{\Sigma} = \text{diag}([\sqrt{\text{Var}(X_1)}, \dots, \sqrt{\text{Var}(X_p)}]^\top)$ .

As  $\lambda \rightarrow 0$  when  $n \rightarrow \infty$ , and since  $(\hat{\beta}_0, \hat{\boldsymbol{\beta}})$  is bounded in probability as  $n \rightarrow \infty$ , we conclude from (S14) that  $\ell_n(\hat{\beta}_0^\lambda, \hat{\boldsymbol{\beta}}^\lambda) = l_n^\lambda(\hat{\beta}_0^\lambda, \hat{\boldsymbol{\beta}}^\lambda) + o_{\mathbb{P}}(1) \geq l_n^\lambda(\hat{\beta}_0, \hat{\boldsymbol{\beta}}) + o_{\mathbb{P}}(1) = \ell_n(\hat{\beta}_0, \hat{\boldsymbol{\beta}}) + o_{\mathbb{P}}(1)$ . Therefore,  $(\hat{\beta}_0^\lambda, \hat{\boldsymbol{\beta}}^\lambda)$  is a near-maximizer of  $\ell_n$  (see e.g. [5] chapter 5), and we conclude that (S13) holds.

Next we show that the term on the right-hand side of the equality at (S13) can be replaced by  $O_{\mathbb{P}}(\lambda)$ . To this end, note that we have from Remark S1 that

$$\begin{aligned} \left\| \begin{bmatrix} \hat{\beta}_0^\lambda - \hat{\beta}_0 \\ \hat{\boldsymbol{\beta}}^\lambda - \hat{\boldsymbol{\beta}} \end{bmatrix} \right\|_\infty &\leq \kappa_{\mathbf{X}}^5 \iota_{\min} \{ \mathbf{T}_n \boldsymbol{\mathcal{I}}(\hat{\beta}_0, \hat{\boldsymbol{\beta}}) \mathbf{T}_n^\top + \lambda \mathbf{I}_{p+1} \}^{-1} \\ &\times \left\{ \left( n^{-1} \sum_{i=1}^n (\|\mathbf{X}_i\|_\infty + 2)^3 \right) \left\| \begin{bmatrix} \hat{\beta}_0^\lambda - \hat{\beta}_0 \\ \hat{\boldsymbol{\beta}}^\lambda - \hat{\boldsymbol{\beta}} \end{bmatrix} \right\|_\infty^2 + \lambda \left\| \begin{bmatrix} \hat{\beta}_0 \\ \hat{\boldsymbol{\beta}} \end{bmatrix} \right\|_\infty \right\}, \end{aligned}$$



where

$$\kappa_{\mathbf{X}} = \left( 1 + \frac{p(\|\hat{\boldsymbol{\mu}}\|_{\infty} + 1)}{\min_{j \in \{1, \dots, p\}} s_{n,j}} \right), \quad \text{and} \quad \mathbf{T}_n = \begin{bmatrix} 1 & \mathbf{0}^{\top} \\ -\hat{\boldsymbol{\Sigma}}^{-1} \hat{\boldsymbol{\mu}} & \hat{\boldsymbol{\Sigma}}^{-1} \end{bmatrix}.$$

213 As for any  $x, y \in \mathbb{R}$  the mean value theorem ensures

$$\left| \frac{e^x}{(1+e^x)^2} - \frac{e^y}{(1+e^y)^2} \right| \leq |x-y| \sup_{z \in \mathbb{R}} \left| \left\{ \frac{e^z}{(1+e^z)^2} \right\} \left( \frac{e^z-1}{1+e^z} \right) \right| \leq |x-y|,$$

214 and since

$$\begin{aligned} & \mathbf{T}_n \{ \mathcal{I}(\hat{\beta}_0, \hat{\boldsymbol{\beta}}) - \mathcal{I}(\beta_{0\star}, \boldsymbol{\beta}_{\star}) \} \mathbf{T}_n^{\top} \\ &= \frac{1}{n} \sum_{i=1}^n \left\{ \frac{\exp\{Y_i(\hat{\beta}_0 + \mathbf{X}_i^{\top} \hat{\boldsymbol{\beta}})\}}{[1 + \exp\{Y_i(\hat{\beta}_0 + \mathbf{X}_i^{\top} \hat{\boldsymbol{\beta}})\}]^2} - \frac{\exp\{Y_i(\beta_{0\star} + \mathbf{X}_i^{\top} \boldsymbol{\beta}_{\star})\}}{[1 + \exp\{Y_i(\beta_{0\star} + \mathbf{X}_i^{\top} \boldsymbol{\beta}_{\star})\}]^2} \right\} \\ & \quad \times \begin{bmatrix} 1 & \mathbf{X}_{i,\text{cs}}^{\top} \\ \mathbf{X}_{i,\text{cs}} & \mathbf{X}_{i,\text{cs}} \mathbf{X}_{i,\text{cs}}^{\top} \end{bmatrix}, \end{aligned}$$

215 we deduce that

$$\begin{aligned} & \left\| \mathbf{T}_n \mathcal{I}(\hat{\beta}_0, \hat{\boldsymbol{\beta}}) \mathbf{T}_n^{\top} - \mathbf{T}_n \mathcal{I}(\beta_{0\star}, \boldsymbol{\beta}_{\star}) \mathbf{T}_n^{\top} \right\|_{\infty} \\ & \leq \frac{1}{n} \sum_{i=1}^n |Y_i \{ (\hat{\beta}_0 - \beta_{0\star}) + \mathbf{X}_i^{\top} (\hat{\boldsymbol{\beta}} - \boldsymbol{\beta}_{\star}) \}| (1 + \|\mathbf{X}_{i,\text{cs}}\|_{\infty}^2) \\ & \leq \max(|\hat{\beta}_0 - \beta_{0\star}|, \|\hat{\boldsymbol{\beta}} - \boldsymbol{\beta}_{\star}\|_{\infty}) \frac{1}{n} \sum_{i=1}^n (1 + \|\mathbf{X}_i\|_{\infty}) (1 + \|\mathbf{X}_{i,\text{cs}}\|_{\infty}^2) \\ & \leq \max(|\hat{\beta}_0 - \beta_{0\star}|, \|\hat{\boldsymbol{\beta}} - \boldsymbol{\beta}_{\star}\|_{\infty}) \\ & \quad \times \left( 1 + p + \frac{1}{n} \sum_{i=1}^n \|\mathbf{X}_i\|_{\infty} + \frac{1}{n} \sum_{i=1}^n \|\mathbf{X}_i\|_{\infty} \|\mathbf{X}_{i,\text{cs}}\|_{\infty}^2 \right) \\ & \leq \max(|\hat{\beta}_0 - \beta_{0\star}|, \|\hat{\boldsymbol{\beta}} - \boldsymbol{\beta}_{\star}\|_{\infty}) \\ & \quad \left( 1 + p + \frac{1 + \kappa_{\mathbf{X}}^2}{n} \sum_{i=1}^n \|\mathbf{X}_i\|_{\infty} + \frac{1}{n \min_{j \in \{1, \dots, p\}} s_{n,j}^2} \sum_{i=1}^n \|\mathbf{X}_i\|_{\infty}^3 \right). \end{aligned}$$

216 Since  $n^{-1} \sum_{i=1}^n \|\mathbf{X}_i\|_{\infty} \leq \sum_{j=1}^p (n^{-1} \sum_{i=1}^n |X_{ij}|)$  and  
 217  $n^{-1} \sum_{i=1}^n \|\mathbf{X}_i\|_{\infty}^3 \leq \sum_{j=1}^p (n^{-1} \sum_{i=1}^n |X_{ij}|^3)$ , and as  $p$  is finite, we obtain  
 218 from the weak law of large numbers that  $n^{-1} \sum_{i=1}^n \|\mathbf{X}_i\|_{\infty} = O_{\mathbb{P}}(1)$  and

219  $n^{-1} \sum_{i=1}^n \|\mathbf{X}_i\|_\infty^3 = O_{\mathbb{P}}(1)$  (recall that we have assumed  $\mathbb{E}(|X_{ij}|^3) < \infty$   
 220 for all  $j \in \{1, \dots, p\}$ ). Furthermore, as we have established above that  
 221  $\mu_{n,j} = \mathbb{E}(X_j) + o_{\mathbb{P}}(1)$  and that  $s_{n,j} = \sqrt{\text{Var}(X_j)} + o_{\mathbb{P}}(1)$ , then, as  $p$  is  
 222 finite, we get  $\kappa_{\mathbf{X}} = O_{\mathbb{P}}(1)$ . Therefore, we conclude from the previous  
 223 equation that

$$\begin{aligned} & \left\| \mathbf{T}_n \mathcal{I}(\widehat{\beta}_0, \widehat{\beta}) \mathbf{T}_n^\top - \mathbf{T}_n \mathcal{I}(\beta_{0\star}, \beta_\star) \mathbf{T}_n^\top \right\|_\infty \\ &= O_{\mathbb{P}} \left\{ \max(|\widehat{\beta}_0 - \beta_{0\star}|, \|\widehat{\beta} - \beta_\star\|_\infty) \right\} = o_{\mathbb{P}}(1), \end{aligned}$$

224 where the last equality followed from the fact that we have assumed  
 225  $\max(|\widehat{\beta}_0 - \beta_{0\star}|, \|\widehat{\beta} - \beta_\star\|_\infty) = o_{\mathbb{P}}(1)$  as  $n \rightarrow \infty$ .

As the weak law of large numbers ensures, under our assumptions, that  
 $\mathcal{I}(\beta_{0\star}, \beta_\star) = \mathbb{E}\{\mathcal{I}(\beta_{0\star}, \beta_\star)\} + o_{\mathbb{P}}(1)$  as  $n \rightarrow \infty$ , and since  $\mathbf{T}_n = \mathbf{T} + o_{\mathbb{P}}(1)$   
 with

$$\mathbf{T} = \begin{bmatrix} 1 & \mathbf{0}^\top \\ -\boldsymbol{\Sigma}^{-1} \boldsymbol{\mu} & \boldsymbol{\Sigma}^{-1} \end{bmatrix},$$

the assumption that

$$\mathbb{E} \left( \begin{bmatrix} 1 & \mathbf{X}_1^\top \\ \mathbf{X}_1 & \mathbf{X}_1 \mathbf{X}_1^\top \end{bmatrix} \right)$$

is invertible implies  $\iota_{\min}\{\mathbf{T} \mathbb{E}\{\mathcal{I}(\beta_{0\star}, \beta_\star)\} \mathbf{T}^\top + \lambda \mathbf{I}_{p+1}\} \geq$   
 $\iota_{\min}\{\mathbf{T} \mathbb{E}\{\mathcal{I}(\beta_{0\star}, \beta_\star)\} \mathbf{T}^\top\} > 0$ . Therefore, we conclude from Slutsky's  
 lemma and the continuous mapping theorem that as  $n \rightarrow \infty$ ,

$$\iota_{\min}\{\mathbf{T}_n \mathcal{I}(\widehat{\beta}_0, \widehat{\beta}) \mathbf{T}_n^\top + \lambda \mathbf{I}_{p+1}\}^{-1} = \iota_{\min}[\mathbf{T} \mathbb{E}\{\mathcal{I}(\beta_{0\star}, \beta_\star)\} \mathbf{T}^\top]^{-1} + o_{\mathbb{P}}(1).$$

226 Therefore, as  $n \rightarrow \infty$ ,

$$\begin{aligned} & \max(|\widehat{\beta}_0^\lambda - \widehat{\beta}_0|, \|\widehat{\beta}^\lambda - \widehat{\beta}\|_\infty) \\ & \leq \left( \iota_{\min}\{\mathbf{T} \mathbb{E}\{\mathcal{I}(\beta_{0\star}, \beta_\star)\} \mathbf{T}^\top\}^{-1} + o_{\mathbb{P}}(1) \right) \\ & \quad \times \left[ O_{\mathbb{P}} \left\{ \max(|\widehat{\beta}_0^\lambda - \widehat{\beta}_0|, \|\widehat{\beta}^\lambda - \widehat{\beta}\|_\infty)^2 \right\} + \lambda \max_{0 \leq j \leq p} |\widehat{\beta}_j| \right]. \end{aligned}$$

227 The proof follows from the fact that, as we have assumed  $\max(|\widehat{\beta}_0 -$   
 228  $\beta_{0\star}|, \|\widehat{\beta} - \beta_\star\|_\infty) = o_{\mathbb{P}}(1)$  as  $n \rightarrow \infty$ , it follows that  $\max_{0 \leq j \leq p} |\widehat{\beta}_j| \leq$   
 229  $\max_{0 \leq j \leq p} |\beta_{j\star}| + o_{\mathbb{P}}(1)$ .  $\square$

230 The preceding lemma implies that if  $\lambda = o(n^{-1/2})$ , and if  $\sqrt{n}\{(\hat{\beta}_0, \hat{\beta}) -$   
 231  $(\beta_{0\star}, \beta_\star)\}$  is asymptotically a mean-zero normal, then the penalized esti-  
 232 mators used in our procedure can replace the unpenalized ones without  
 233 affecting the asymptotic normality result. In other words,  $\sqrt{n}\{(\hat{\beta}_0^\lambda, \hat{\beta}^\lambda) -$   
 234  $(\beta_{0\star}, \beta_\star)\}$  has the same asymptotic distribution than  $\sqrt{n}\{(\hat{\beta}_0, \hat{\beta}) -$   
 235  $(\beta_{0\star}, \beta_\star)\}$ .

236 Under our conditions, using arguments that are similar to those used  
 237 in e.g. [5] chapter 5, under our conditions, the asymptotic variance-  
 238 covariance matrix of  $\sqrt{n}\{(\hat{\beta}_0, \hat{\beta}) - (\beta_{0\star}, \beta_\star)\}$  is given by

$$(\mathbb{E}\{\mathcal{I}(\beta_{0\star}, \beta_\star)\})^{-1} \\ = \left[ \mathbb{E} \left\{ \frac{\exp\{Y_1(\beta_{0\star} + \mathbf{X}_1^\top \beta_\star)\}}{[1 + \exp\{Y_1(\beta_{0\star} + \mathbf{X}_1^\top \beta_\star)\}]^2} \begin{bmatrix} 1 & \mathbf{X}_1^\top \\ \mathbf{X}_1 & \mathbf{X}_1 \mathbf{X}_1^\top \end{bmatrix} \right\} \right]^{-1}.$$

Inference on  $(\beta_{0\star}, \beta_\star)$  based on the maximum likelihood estimator  $(\hat{\beta}_0, \hat{\beta})$  (for example, constructing confidence intervals or performing hypothesis tests) is typically carried out by combining these estimators with their corresponding standard errors. The standard deviation of  $\hat{\beta}_j$ , given by  $\sqrt{\text{Var}(\hat{\beta}_j)} = n^{-1/2}[(\mathbb{E}\{\mathcal{I}(\beta_{0\star}, \beta_\star)\})^{-1}]_{jj}$  is commonly estimated using the following quantity:

$$\hat{\sigma}_j := \frac{1}{\sqrt{n}} \left( \left[ (\mathcal{I}(\hat{\beta}_0, \hat{\beta}))^{-1} \right]_{jj} \right)^{1/2}.$$

Based on Lemma S3, which implies that  $\max(|\hat{\beta}_0^\lambda - \hat{\beta}_0|, \|\hat{\beta}^\lambda - \hat{\beta}\|_\infty) = O_{\mathbb{P}}(\lambda)$  as  $n \rightarrow \infty$ , and using theoretical arguments similar to those employed therein, it is straightforward to show that, if  $\lambda = o(n^{-1/2})$ , as  $n \rightarrow \infty$ ,

$$\frac{1}{\sqrt{n}} \left( \left[ (\mathcal{I}(\hat{\beta}_0^\lambda, \hat{\beta}^\lambda))^{-1} \right]_{jj} \right)^{1/2} = \hat{\sigma}_j \{1 + o_{\mathbb{P}}(1)\}.$$

239 The proof of the consistency of our standard error computation procedure  
 240 follows from the derivations provided in the following section, which show  
 241 that  $[(\mathcal{I}(\hat{\beta}_0^\lambda, \hat{\beta}^\lambda))^{-1}]_{jj} = [(\mathcal{I}^\lambda)^{-1}]_{jj}/s_{n,j}^2$ , with  $\mathcal{I}^\lambda$  defined at the beginning  
 242 of Methods 4.2.3 in the manuscript.

## 2.2 Computation of standard errors

Let  $(y_1, \mathbf{x}_1), \dots, (y_n, \mathbf{x}_n)$  to denote  $n$  independent realizations of the random pair  $(\mathbf{X}, Y)$ . We next describe the derivation of the expression for the estimates of standard errors.

As in the proof of Proposition S1, let  $(\check{\beta}_0^\lambda, \check{\beta}^\lambda)$  to denote the solutions of the following maximization problem:

$$\max_{\beta_0 \in \mathbb{R}, \beta \in \mathbb{R}^p} \left( \frac{1}{n} \sum_{i=1}^n \log \left[ \frac{1}{1 + \exp\{-y_i(\beta_0 + \mathbf{x}_{i,\text{cs}}^\top \beta)\}} \right] + \lambda \sum_{j=0}^p \beta_j^2 \right).$$

Then, for  $j \in \{1, \dots, p\}$ , one obtains from the relationship between  $(\hat{\beta}_0^\lambda, \hat{\beta}^\lambda)$  and  $(\check{\beta}_0^\lambda, \check{\beta}^\lambda)$  that

$$[\{\mathcal{I}(\hat{\beta}_0^\lambda, \hat{\beta}^\lambda)\}^{-1}]_{jj} = [\{-\nabla_{\beta_0, \beta}^2 \check{\ell}_n(\check{\beta}_0^\lambda, \check{\beta}^\lambda)\}^{-1}]_{jj} / s_{n,j}^2,$$

where

$$\begin{aligned} -\nabla_{\beta_0, \beta}^2 \check{\ell}_n(\check{\beta}_0^\lambda, \check{\beta}^\lambda) &= \frac{1}{n} \sum_{i=1}^n \frac{\exp\{y_i(\check{\beta}_0^\lambda + \mathbf{x}_{i,\text{cs}}^\top \check{\beta}^\lambda)\}}{[1 + \exp\{y_i(\check{\beta}_0^\lambda + \mathbf{x}_{i,\text{cs}}^\top \check{\beta}^\lambda)\}]^2} \begin{bmatrix} 1 & \mathbf{x}_{i,\text{cs}}^\top \\ \mathbf{x}_{i,\text{cs}} & \mathbf{x}_{i,\text{cs}} \mathbf{x}_{i,\text{cs}}^\top \end{bmatrix} \\ &= \frac{1}{n} \sum_{i=1}^n \frac{\exp\{y_i(\hat{\beta}_0^\lambda + \mathbf{x}_i^\top \hat{\beta}^\lambda)\}}{[1 + \exp\{y_i(\hat{\beta}_0^\lambda + \mathbf{x}_i^\top \hat{\beta}^\lambda)\}]^2} \begin{bmatrix} 1 & \mathbf{x}_{i,\text{cs}}^\top \\ \mathbf{x}_{i,\text{cs}} & \mathbf{x}_{i,\text{cs}} \mathbf{x}_{i,\text{cs}}^\top \end{bmatrix}. \end{aligned}$$

Now, recall that, for each  $k \in \{1, \dots, K\}$ , the vector  $\hat{\mathbf{c}}^{\lambda(k)}$  defined in (12) satisfies  $\hat{\mathbf{c}}^{\lambda(k)} = \mathbf{X}_{\text{cs}}^{(k)} \text{diag}(s_{n,1}^{(k)}, \dots, s_{n,p(k)}^{(k)}) \hat{\beta}^{\lambda(k)} = \mathbf{X}^{(k)} \hat{\beta}^{\lambda(k)} - (\sum_{j=1}^{p(k)} \hat{\beta}_j^{\lambda(k)} \mu_j^{(k)}) \mathbf{1}_n$ , and that the response-node has access to  $\hat{\mathbf{c}}^{\lambda(1)}, \dots, \hat{\mathbf{c}}^{\lambda(K)}$ . Since the response-node can also compute  $(n\lambda)^{-1} \sum_{i=1}^n \hat{\alpha}_i^\lambda y_i = \hat{\beta}_0^\lambda + \sum_{j=1}^n \hat{\beta}_j^\lambda \mu_{n,j}$  (recall the expression given in (11)), it is therefore able to compute

$$\hat{\beta}_0^\lambda \mathbf{1}_n + \mathbf{X} \hat{\beta}^\lambda = \hat{\beta}_0^\lambda \mathbf{1}_n + \sum_{k=1}^K \mathbf{X}^{(k)} \hat{\beta}^{\lambda(k)} = ((n\lambda)^{-1} \sum_{i=1}^n \hat{\alpha}_i^\lambda y_i) \mathbf{1}_n + \sum_{k=1}^K \hat{\mathbf{c}}^{\lambda(k)}.$$

Then, upon defining a version  $\widehat{\mathbf{V}}^\lambda$  introduced above (7) with  $\tilde{\boldsymbol{\alpha}}^\lambda$  there replaced by  $\widehat{\boldsymbol{\alpha}}^\lambda$ , whose diagonal entries  $[\widehat{\mathbf{V}}^\lambda]_{jj}$  satisfying

$$\begin{aligned} [\widehat{\mathbf{V}}^\lambda]_{jj} &= \frac{\exp \left[ y_j \left\{ (n\lambda)^{-1} \sum_{i=1}^n \widehat{\alpha}_i^\lambda y_i + \sum_{k=1}^K \widehat{c}_j^{\lambda(k)} \right\} \right]}{\left( 1 + \exp \left[ y_j \left\{ (n\lambda)^{-1} \sum_{i=1}^n \widehat{\alpha}_i^\lambda y_i + \sum_{k=1}^K \widehat{c}_j^{\lambda(k)} \right\} \right] \right)^2} \\ &= \frac{\exp \{ y_j (\widehat{\beta}_0^\lambda + \mathbf{x}_j^\top \widehat{\boldsymbol{\beta}}^\lambda) \}}{[1 + \exp \{ y_j (\widehat{\beta}_0^\lambda + \mathbf{x}_j^\top \widehat{\boldsymbol{\beta}}^\lambda) \}]^2}, \end{aligned}$$

the matrix  $-\nabla_{\beta_0, \boldsymbol{\beta}}^2 \check{\ell}_n(\check{\beta}_0^\lambda, \check{\boldsymbol{\beta}}^\lambda)$  can be computed as

$$\begin{aligned} \mathcal{I}^\lambda &= n^{-1} \begin{bmatrix} \mathbf{1}_n & \mathbf{X}_{\text{cs}}^{(1)} & \dots & \mathbf{X}_{\text{cs}}^{(k)} \end{bmatrix}^\top \widehat{\mathbf{V}}^\lambda \begin{bmatrix} \mathbf{1}_n & \mathbf{X}_{\text{cs}}^{(1)} & \dots & \mathbf{X}_{\text{cs}}^{(k)} \end{bmatrix} \\ &= n^{-1} \begin{bmatrix} \mathbf{1}_n^\top \widehat{\mathbf{V}}^\lambda \mathbf{1}_n & \mathbf{1}_n^\top \widehat{\mathbf{V}}^\lambda \mathbf{X}_{\text{cs}}^{(1)} & \dots & \mathbf{1}_n^\top \widehat{\mathbf{V}}^\lambda \mathbf{X}_{\text{cs}}^{(K)} \\ (\mathbf{X}_{\text{cs}}^{(1)})^\top \widehat{\mathbf{V}}^\lambda \mathbf{1}_n & (\mathbf{X}_{\text{cs}}^{(1)})^\top \widehat{\mathbf{V}}^\lambda \mathbf{X}_{\text{cs}}^{(1)} & \dots & (\mathbf{X}_{\text{cs}}^{(1)})^\top \widehat{\mathbf{V}}^\lambda \mathbf{X}_{\text{cs}}^{(K)} \\ \vdots & \vdots & \ddots & \vdots \\ (\mathbf{X}_{\text{cs}}^{(K)})^\top \widehat{\mathbf{V}}^\lambda \mathbf{1}_n & (\mathbf{X}_{\text{cs}}^{(K)})^\top \widehat{\mathbf{V}}^\lambda \mathbf{X}_{\text{cs}}^{(1)} & \dots & (\mathbf{X}_{\text{cs}}^{(K)})^\top \widehat{\mathbf{V}}^\lambda \mathbf{X}_{\text{cs}}^{(K)} \end{bmatrix}. \end{aligned}$$

### Supplementary Methods 3 Selected box-constrained optimization algorithm and stopping criteria

#### 3.1 Two-metric projected newton algorithm

The convexity of the dual problem to solve at the response-node ensures that a unique solution exists on the domain of the objective function. The algorithm used to solve the problem should allow sufficient descent to reach an adequate approximation of this unique solution. Since the components of  $\boldsymbol{\alpha}$  are bounded by a compact set included in the open set  $(0, 1)$  (see Supplementary Methods 1), an algorithm adequate for box-constrained convex optimization problem had to be selected. While many methods exist for box-constrained optimization [6], the chosen method should allow to reach convergence with sufficient precision given the potentially small magnitude of the dual parameter  $\boldsymbol{\alpha}$  while still offering efficient computation when the dimension of the dual is high. We used the Two-Metric Projected Newton method suggested by Bertsekas

[7], applicable because Lemma S1 ensures that the dual parameter estimates lie in a compact parameter space  $\Theta_{\alpha,\lambda}^{\mathbf{x}} \subset (0,1)$ . We refer to [8] for an extensive description of the method and convergence details. Briefly, all components of the estimate  $\hat{\alpha}_{(t)}^\lambda$  at step  $t$  at a boundary of the search domain and for which the gradient would pull the search toward the opposite side of the search domain are updated through gradient descent projected in the domain, while all other components are updated using Newton descent projected in the domain. The update is therefore  $\hat{\alpha}_{(t+1)}^\lambda = \text{Proj}[\hat{\alpha}_{(t)}^\lambda - \theta \mathbf{D}_{(t)} \nabla_{\alpha} J^\lambda(\hat{\alpha}_{(t)}^\lambda)]$ , where  $\mathbf{D}_{(t)}$  depends of the component as described before and  $\text{Proj}[\cdot]$  denotes the projection under the Euclidean norm. The step size  $\theta$  is selected through backtracking line search (Armijo rule) along projection arc detailed in [6, 8]. An initial admissible estimate has to be provided, which was set at  $\hat{\alpha}_{(0)}^\lambda = [0.1, \dots, 0.1]^\top$ .

### 3.2 Stopping criteria

The error entailed by the approximation of  $\hat{\alpha}^\lambda$  in the chosen algorithm should ideally be low enough such that it preserve the asymptotic properties derived for the primal estimate. We notice that  $\lambda$  holds a scaling role over the dual parameter  $\alpha$  when it comes to retrieving the associated primal parameter  $\beta$ . A restriction in function of  $\lambda$  consequently needs to be imposed in the estimation of the dual parameter to preserve the asymptotic properties of the primal parameters. The following proposition will allow to derive a stopping criteria for the dual estimation that ensures the asymptotic properties of the primal parameter hold.

**Proposition S2.** *For any  $(y_1, \mathbf{x}_1), \dots, (y_n, \mathbf{x}_n) \in \{-1, 1\} \times \mathbb{R}^p$  and any  $\epsilon > 0$ , consider  $\tilde{\alpha}^\lambda := \tilde{\alpha}_\epsilon^\lambda \in (0, 1)^n$  such that*

$$\|\nabla_{\alpha} J^\lambda(\tilde{\alpha}^\lambda)\|_2 \leq \frac{2\lambda}{\sqrt{p+1}} \left( \sum_{j=1}^p \sum_{i=1}^n x_{ij}^2 + n \right)^{-1/2} \epsilon.$$

*Then,  $\max_{j \in \{0, \dots, p\}} |\tilde{\beta}_j^\lambda - \check{\beta}_j^\lambda| < \epsilon$ , where  $\tilde{\beta}_0^\lambda = \sum_{i=1}^n y_i \tilde{\alpha}_i^\lambda$  and  $\tilde{\beta}_j^\lambda = \sum_{i=1}^n y_i \tilde{\alpha}_i^\lambda x_{ij}$  for  $j \in \{1, \dots, p\}$ , and with the  $\check{\beta}_j^\lambda$ 's,  $j \in \{0, \dots, p\}$ , defined as in Lemma S1.*

*Proof of Proposition S2.* Fix  $\epsilon > 0$ , and let  $\tilde{\alpha}^\lambda$  and  $\tilde{\beta}_j^\lambda$ , for  $j \in \{0, \dots, p\}$ , be as defined in the statement of the lemma. (Although  $\tilde{\alpha}^\lambda$  and the  $\tilde{\beta}_j^\lambda$ 's implicitly depend on  $\epsilon$ , this dependence is not explicitly reflected in the notation, for simplicity in the exposition.) For simplicity in the proof,

309 for  $i \in \{1, \dots, n\}$  let  $x_{0i} = 1$ , so that  $\tilde{\beta}_j^\lambda = \sum_{i=1}^n y_i \tilde{\alpha}_i^\lambda x_{ij}$  and  $\hat{\beta}_j^\lambda =$   
 310  $\sum_{i=1}^n y_i \hat{\alpha}_i^\lambda x_{ij}$  for  $j \in \{0, \dots, p\}$ .

311 Let  $\check{\alpha}^\lambda$  be defined as in Lemma S1, and recall from that lemma that  
 312  $\check{\beta}_0^\lambda = \sum_{i=1}^n y_i \check{\alpha}_i^\lambda$  and  $\check{\beta}_j^\lambda = \sum_{i=1}^n y_i \check{\alpha}_i^\lambda x_{ij}$  for  $j \in \{1, \dots, p\}$ .

313 Using the fact that  $y_i \in \{-1, 1\}$  for all  $i \in \{1, \dots, n\}$ , we derive

$$\begin{aligned}
 \max_{j \in \{0, \dots, p\}} |\tilde{\beta}_j^\lambda - \check{\beta}_j^\lambda| &= \max_{j \in \{0, \dots, p\}} \left| (\lambda n)^{-1} \sum_{i=1}^n x_{ij} y_i (\tilde{\alpha}_i^\lambda - \check{\alpha}_i^\lambda) \right| \\
 &\leq (\lambda n)^{-1} \sum_{j=0}^p \sum_{i=1}^n |x_{ij}| |\tilde{\alpha}_i^\lambda - \check{\alpha}_i^\lambda| \\
 &\leq (\lambda n)^{-1} \|\tilde{\alpha}^\lambda - \check{\alpha}^\lambda\|_2 \sum_{j=0}^p \left( \sum_{i=1}^n x_{ij}^2 \right)^{1/2} \\
 &\leq \sqrt{p+1} (\lambda n)^{-1} \|\tilde{\alpha}^\lambda - \check{\alpha}^\lambda\|_2 \left( \sum_{j=0}^p \sum_{i=1}^n x_{ij}^2 \right)^{1/2}. \quad (\text{S15})
 \end{aligned}$$

314 To obtain the one-to-last line, we used Cauchy-Schwartz inequality, and  
 315 to obtain the last line, we used the fact that for any positive  $a_0, \dots, a_p$   
 316 we have  $\sum_{j=0}^p a_j \leq \sqrt{p+1} (\sum_{j=0}^p a_j^2)^{1/2}$

317 Now observe that, using standard vector calculus manipulations, the  
 318 Hessian matrix of  $J^\lambda(\alpha)$  can be expressed as

$$\begin{aligned}
 \nabla_\alpha^2 J^\lambda(\alpha) &= (\lambda n^2)^{-1} \text{diag}(\mathbf{y}) \mathcal{K} \text{diag}(\mathbf{y}) \\
 &\quad + n^{-1} \text{diag} \left\{ [(\alpha_1(1 - \alpha_1))^{-1}, \dots, (\alpha_n(1 - \alpha_n))^{-1}]^\top \right\},
 \end{aligned}$$

319 where we used the notation  $\mathcal{K} = \mathbf{X} \mathbf{X}^\top + \mathbf{1}_n \mathbf{1}_n^\top$  as defined in Supplemen-  
 320 tary Tables 1.

321 In the equation above, the matrix in the first term of the right-  
 322 hand side of the equality is semi-positive definite, since for any vector  
 323  $\alpha \in \mathbb{R}^n$ ,  $\alpha^\top \text{diag}(\mathbf{y}) \mathcal{K} \text{diag}(\mathbf{y}) \alpha = \|[\mathbf{X} \ \mathbf{1}_n]^\top \text{diag}(\mathbf{y}) \alpha\|_2^2 \geq 0$ . As the  
 324 matrix  $n^{-1} \text{diag}\{[(\alpha_1(1 - \alpha_1))^{-1}, \dots, (\alpha_n(1 - \alpha_n))^{-1}]^\top\}$  is positive defi-  
 325 nite for all  $\alpha \in (0, 1)^n$ , with  $(\alpha_i(1 - \alpha_i))^{-1} \geq 4$  for all  $i \in \{1, \dots, n\}$ , it  
 326 follows that  $\nabla_\alpha^2 J^\lambda(\alpha)$  is strongly convex, with strong convexity parameter  
 327  $m = 4n^{-1}$ , since it follows from the last discussion that the matrix

$$\nabla_\alpha^2 J^\lambda(\alpha) - \frac{m}{2} \mathbf{I},$$

328 is positive definite.

329 This allows us to conclude as in e.g. [9], Section 9.1.2, p.459, that it  
 330 holds for all  $\alpha \in (0, 1)^n$  that

$$\|\alpha - \check{\alpha}^\lambda\|_2 \leq \frac{2}{m} \|\nabla_\alpha J^\lambda(\alpha)\|_2 = \frac{n}{2} \|\nabla_\alpha J^\lambda(\alpha)\|_2.$$

331 Combining this result with the inequality derived at (S15), we obtain

$$\max_{j \in \{0, \dots, p\}} |\tilde{\beta}_j^\lambda - \check{\beta}_j^\lambda| \leq \frac{\sqrt{p+1}}{2\lambda} \|\nabla_\alpha J^\lambda(\tilde{\alpha}^\lambda)\|_2 \left( \sum_{j=0}^p \sum_{i=1}^n x_{ij}^2 \right)^{1/2}.$$

332 The proof of the lemma follows from the assumption over  
 333  $\|\nabla_\alpha J^\lambda(\tilde{\alpha}^\lambda)\|_2$ .

334 □

335 As shown in the proof of Proposition S1, the maximizer  $(\hat{\beta}_0^\lambda, \hat{\beta}^\lambda)$  of  
 336  $l_n^\lambda(\beta_0, \beta)$ , defined in (2) in the manuscript, satisfies

$$\begin{bmatrix} \hat{\beta}_0^\lambda \\ \hat{\beta}^\lambda \end{bmatrix} = \begin{bmatrix} \check{\beta}_0^\lambda - \hat{\mu}^\top \hat{\beta}^\lambda \\ \hat{\Sigma}^{-1} \check{\beta}^\lambda \end{bmatrix},$$

where  $\hat{\mu}$  and  $\hat{\Sigma}$  are defined in (S7), and where  $(\check{\beta}_0^\lambda, \check{\beta}^\lambda)$ , satisfies

$$\begin{bmatrix} \check{\beta}_0^\lambda \\ \check{\beta}^\lambda \end{bmatrix} = (n\lambda)^{-1} \sum_{i=1}^n y_i \hat{\alpha}_i^\lambda \begin{bmatrix} 1 \\ \mathbf{x}_{i,cs} \end{bmatrix}.$$

337 In the last equation,  $\hat{\alpha}^\lambda = (\hat{\alpha}_1^\lambda, \dots, \hat{\alpha}_n^\lambda)^\top \in (0, 1)^n$  denotes the unique  
 338 solution to the minimization problem  $\min_{\alpha \in (0, 1)^n} J^\lambda(\alpha)$ , with  $J^\lambda$  as in (3).

From Proposition S2, if  $\tilde{\alpha}^\lambda$  is a point such that

$$\|\nabla_\alpha J^\lambda(\tilde{\alpha}^\lambda)\|_2 \leq \frac{2\lambda}{\sqrt{p+1}} \left( \sum_{j=1}^p \sum_{i=1}^n x_{ij,cs}^2 + n \right)^{-1/2} \epsilon,$$

339 it follows that  $\max_{j \in \{0, \dots, p\}} |\check{\beta}_j^\lambda - \tilde{\beta}_j^\lambda| < \epsilon$ , where  $\check{\beta}_0^\lambda = \sum_{i=1}^n y_i \tilde{\alpha}_i^\lambda$  and  
 340  $\check{\beta}_j^\lambda = \sum_{i=1}^n y_i \tilde{\alpha}_i^\lambda x_{ij,cs}$  for  $j \in \{1, \dots, p\}$ . Therefore, if  $(\tilde{\beta}_0^\lambda, \tilde{\beta}^\lambda)$  denotes a  
 341 version of  $(\hat{\beta}_0^\lambda, \hat{\beta}^\lambda)$  computed based on  $\tilde{\alpha}^\lambda$  instead of  $\hat{\alpha}^\lambda$ , i.e, if  $(\tilde{\beta}_0^\lambda, \tilde{\beta}^\lambda)$



342 satisfies

$$\begin{bmatrix} \tilde{\beta}_0^\lambda \\ \tilde{\beta}^\lambda \end{bmatrix} = \begin{bmatrix} \check{\beta}_0^\lambda - \hat{\mu}^\top \check{\beta}^\lambda \\ \hat{\Sigma}^{-1} \check{\beta}^\lambda \end{bmatrix},$$

343 then, for  $j \in \{1, \dots, p\}$ , we have

$$|\hat{\beta}_j^\lambda - \tilde{\beta}_j^\lambda| \leq s_{n,j}^{-1} |\check{\beta}_j^\lambda - \check{\beta}_j^\lambda| \leq s_{n,j}^{-1} \epsilon.$$

## 344 Supplementary Methods 4 Privacy-preserving 345 properties

### 346 4.1 Proof of Proposition 1

347 Before proving Proposition 1, we state and prove the following lemma,  
348 which provides the foundation for the proof of Proposition 1. Let  $\mathbf{e}_{i,p^{(k)}} \in$   
349  $\mathbb{R}^{p^{(k)}}$  denote the standard basis vector with a 1 in the  $i^{\text{th}}$  position and 0  
350 elsewhere.

351 **Lemma S4.** *Let  $\mathbf{A} \in \mathbb{S}(\mathcal{K}^{(k)})$ , and consider  $\mathbf{P} \in \mathcal{M}_{p^{(k)},p^{(k)}}(\mathbb{R})$  such that*  
352  *$\mathbf{P}\mathbf{P}^\top = \mathbf{I}_{p^{(k)}}$ . Then, if  $\|\mathbf{A}\mathbf{P}\mathbf{e}_{i,p^{(k)}}\|_2^2 = (n-1)$  for all  $1 \leq i \leq p^{(k)} - 1$ , we*  
353 *have  $\mathbf{A}\mathbf{P} \in \mathbb{S}(\mathcal{K}^{(k)})$ .*

354 *Proof of Lemma S4.* First note that  $\mathbb{S}(\mathcal{K}^{(k)})$  is non-empty since  $\mathbf{X}_{\text{cs}}^{(k)} \in$   
355  $\mathbb{S}(\mathcal{K}^{(k)})$ . From this, to show that  $\mathbf{A}\mathbf{P} \in \mathbb{S}(\mathcal{K}^{(k)})$  whenever  $\mathbf{A} \in \mathbb{S}(\mathcal{K}^{(k)})$ ,  
356  $\mathbf{P} \in \mathcal{M}_{p^{(k)},p^{(k)}}(\mathbb{R})$  with  $\mathbf{P}\mathbf{P}^\top = \mathbf{I}_{p^{(k)}}$  and  $\|\mathbf{A}\mathbf{P}\mathbf{e}_{i,p^{(k)}}\|_2^2 = (n-1)$  for all  
357  $1 \leq i \leq p^{(k)} - 1$ , we need to verify that for such  $\mathbf{A}$  and  $\mathbf{P}$  we have (1)  
358  $(\mathbf{A}\mathbf{P})(\mathbf{A}\mathbf{P})^\top = \mathcal{K}^{(k)}$ ; (2)  $(\mathbf{A}\mathbf{P})^\top \mathbf{1}_n = 0$ ; and (3)  $\text{diag}_{\text{vec}}\{(\mathbf{A}\mathbf{P})^\top(\mathbf{A}\mathbf{P})\} =$   
359  $(n-1)\mathbf{1}_{p^{(k)}}$ .

360 To verify (1), it suffices to note that, since by definition  $\mathbf{A}\mathbf{A}^\top = \mathcal{K}^{(k)}$   
361 and  $\mathbf{P}\mathbf{P}^\top = \mathbf{I}_{p^{(k)}}$ , we have  $(\mathbf{A}\mathbf{P})(\mathbf{A}\mathbf{P})^\top = \mathbf{A}(\mathbf{P}\mathbf{P}^\top)\mathbf{A}^\top = \mathbf{A}\mathbf{A}^\top = \mathcal{K}^{(k)}$ .

362 To verify (2), since  $\mathbf{A} \in \mathbb{S}(\mathcal{K}^{(k)})$  implies  $\mathbf{A}^\top \mathbf{1}_n = 0$ , one directly  
363 computes that  $(\mathbf{A}\mathbf{P})^\top \mathbf{1}_n = \mathbf{P}^\top (\mathbf{A}^\top \mathbf{1}_n) = 0$ .

364 To verify (3), note that  $\text{diag}_{\text{vec}}\{(\mathbf{A}\mathbf{P})^\top(\mathbf{A}\mathbf{P})\} = (n-1)\mathbf{1}_{p^{(k)}}$  if and  
365 only if  $\|\mathbf{A}\mathbf{P}\mathbf{e}_{i,p^{(k)}}\|_2^2 = (n-1)$  for all  $1 \leq i \leq p^{(k)}$ . Since we have only  
366 assumed that  $\|\mathbf{A}\mathbf{P}\mathbf{e}_{i,p^{(k)}}\|_2^2 = (n-1)$  for all  $1 \leq i \leq p^{(k)} - 1$ , we need to  
367 prove that, under our conditions,  $\|\mathbf{A}\mathbf{P}\mathbf{e}_{p^{(k)},p^{(k)}}\|_2^2 = (n-1)$ . To see why  
368 this is the case, note that since  $\text{diag}_{\text{vec}}(\mathbf{A}^\top \mathbf{A}) = (n-1)\mathbf{1}_{p^{(k)}}$ , we have

$$\sum_{i=1}^{p^{(k)}} \|\mathbf{A}\mathbf{P}\mathbf{e}_{i,p^{(k)}}\|_2^2 = \text{Tr}\{(\mathbf{A}\mathbf{P})^\top(\mathbf{A}\mathbf{P})\}$$

$$= \text{Tr}(\mathbf{A}^\top \mathbf{A}) = p^{(k)}(n-1).$$

369 This implies that  $\|\mathbf{A}\mathbf{P}\mathbf{e}_{p^{(k)},p^{(k)}}\|_2^2 = (n-1)$ , thereby concluding the proof  
 370 of the proposition.

371

□

372 *Proof of Proposition 1.* First note that since  $\mathbf{X}_{\text{cs}}^{(k)} \in \mathbb{S}(\mathcal{K}^{(k)})$ , Lemma S4  
 373 implies that for any orthogonal matrix  $\mathbf{P} \in \mathcal{M}_{p^{(k)},p^{(k)}}(\mathbb{R})$  such that  
 374  $\|\mathbf{X}_{\text{cs}}^{(k)}\mathbf{P}\mathbf{e}_{i,p^{(k)}}\|_2^2 = (n-1)$  for all  $1 \leq i \leq p^{(k)} - 1$ , we have  $\mathbf{X}_{\text{cs}}^{(k)}\mathbf{P} \in$   
 375  $\mathbb{S}(\mathcal{K}^{(k)})$ . Since  $\mathbf{P}\mathbf{e}_{j,p^{(k)}}$  corresponds to the  $j^{\text{th}}$  column of  $\mathbf{P}$ , say  $\mathbf{p}_j$ , which  
 376 has unit norm, and each column of  $\mathbf{X}_{\text{cs}}^{(k)}$  has squared Euclidian norm  
 377 equal to  $n-1$ , it follows that  $\|\mathbf{X}_{\text{cs}}^{(k)}\mathbf{P}\mathbf{e}_{j,p^{(k)}}\|_2^2 = n-1$  for all  $1 \leq j \leq p^{(k)}$   
 378 if and only if

$$\mathbf{p}_j^\top \left\{ \frac{(\mathbf{X}_{\text{cs}}^{(k)})^\top \mathbf{X}_{\text{cs}}^{(k)}}{n-1} - \mathbf{I}_{p^{(k)}} \right\} \mathbf{p}_j = 0 \quad \text{for all } j \in \{1, \dots, p^{(k)}\},$$

379 or equivalently, if and only if

$$\sum_{\ell=1}^{p^{(k)}-1} \sum_{\ell'=\ell+1}^{p^{(k)}} [\mathbf{P}]_{\ell j} [\mathbf{P}]_{\ell' j} \left\{ \sum_{i=1}^n x_{i\ell,\text{cs}}^{(k)} x_{i\ell',\text{cs}}^{(k)} \right\} = 0 \quad \text{for all } j \in \{1, \dots, p^{(k)}\}.$$

380 One of these equations is redundant, since  $\sum_{j=1}^{p^{(k)}} [\mathbf{P}]_{\ell j} [\mathbf{P}]_{\ell' j} = 0$  when  
 381  $\ell \neq \ell'$ , due to the orthogonality of the rows of  $\mathbf{P}$ . We conclude by dividing  
 382 each side of the previous equation by  $n$  that if  $\mathbf{P}$  is orthogonal and satisfies

$$\sum_{\ell=1}^{p^{(k)}-1} \sum_{\ell'=\ell+1}^{p^{(k)}} [\mathbf{P}]_{\ell j} [\mathbf{P}]_{\ell' j} \tau_{\ell\ell'}^{(k)} = 0 \quad \text{for all } j \in \{1, \dots, p^{(k)} - 1\},$$

383 then  $\mathbf{X}_{\text{cs}}^{(k)}\mathbf{P} \in \mathbb{S}(\mathcal{K}^{(k)})$ . From this, to conclude the proof of the propo-  
 384 sition, we need to show that any  $\mathbf{A} \in \mathbb{S}(\mathcal{K}^{(k)})$  expresses as  $\mathbf{X}_{\text{cs}}^{(k)}\mathbf{P}$ , with  $\mathbf{P}$   
 385 an orthogonal matrix such that  $\sum_{\ell=1}^{p^{(k)}-1} \sum_{\ell'=\ell+1}^{p^{(k)}} [\mathbf{P}]_{\ell j} [\mathbf{P}]_{\ell' j} \tau_{\ell\ell'}^{(k)} = 0$  for all  
 386  $j \in \{1, \dots, p^{(k)} - 1\}$ .

387 First, from Theorem 7.3.11 in [10] (p.452), if  $\mathbf{A} \in \mathcal{M}_{n,p^{(k)}}(\mathbb{R})$  is such  
 388 that  $\mathbf{A}\mathbf{A}^\top = \mathbf{X}_{\text{cs}}^{(k)}(\mathbf{X}_{\text{cs}}^{(k)})^\top$ , then there exists an orthogonal matrix  $\mathbf{P} \in$   
 389  $\mathcal{M}_{p^{(k)},p^{(k)}}(\mathbb{R})$  such that  $\mathbf{A} = \mathbf{X}_{\text{cs}}^{(k)}\mathbf{P}$ .

The proposition result then follows from the fact that, since  $\mathbf{A} \in \mathbb{S}(\mathcal{K}^{(k)})$  implies  $\text{diag}_{\text{vec}}(\mathbf{A}^\top \mathbf{A}) = (n-1)\mathbf{1}_{p^{(k)}}$ , we have

$$\text{diag}_{\text{vec}}\{(\mathbf{X}_{\text{cs}}^{(k)} \mathbf{P})^\top (\mathbf{X}_{\text{cs}}^{(k)} \mathbf{P})\} = (n-1)\mathbf{1}_{p^{(k)}} ,$$

390 which implies that  $\|\mathbf{X}_{\text{cs}}^{(k)} \mathbf{P} \mathbf{e}_{i,p^{(k)}}\|_2^2 = (n-1)$  for all  $1 \leq i \leq p^{(k)} - 1$ .  $\square$

## 391 4.2 Orthogonal matrices that preserve the binary nature of 392 covariates

393 **Proposition S3.** *Let  $p^{(k)} \geq 2$ , and for each  $j \in \{1, \dots, p^{(k)}\}$ , define  
394  $\mathcal{D}_j = \{a_j, b_j\}$  with  $a_j \neq b_j$ . Assume that  $\mathbf{A} \in \mathcal{M}_{n,p^{(k)}}(\mathbb{R})$  satisfies  $\mathbf{A}_{ij} \in$   
395  $\mathcal{D}_j$  for all  $i \in \{1, \dots, n\}$  and  $j \in \{1, \dots, p^{(k)}\}$ . If  $n \geq 2^{p^{(k)}}$  and  $\mathbf{A}$  contains  
396 exactly  $2^{p^{(k)}}$  distinct rows, then any orthogonal matrix  $\mathbf{P} \in \mathbb{R}^{p^{(k)} \times p^{(k)}}$   
397 such that  $[\mathbf{A}\mathbf{P}]_{ij} \in \{a'_j, b'_j\}$  for some  $a'_j \neq b'_j$  for all  $i \in \{1, \dots, n\}$  and  
398  $j \in \{1, \dots, p^{(k)}\}$  must be a sign-permutation matrix.*

*Proof of Proposition S3.* Let  $\mathbf{A}' \in \mathcal{M}_{2^{p^{(k)}}, p^{(k)}}(\mathbb{R})$  denote a submatrix of  $\mathbf{A}$  consisting of  $2^{p^{(k)}}$  distinct rows. Assume without loss of generality that the rows of  $\mathbf{A}'$  are arranged in a way that

$$[\mathbf{A}']_{ij} = \begin{cases} a_j & \text{if } [\text{bin}(i-1)]_j = 0 \\ b_j & \text{if } [\text{bin}(i-1)]_j = 1, \end{cases}$$

where, for any integer  $i$ , we use  $\text{bin}(i)$  to denote a vector containing its binary representation. In this notation,  $\mathbf{A}'$  has the form

$$\mathbf{A}' = \begin{bmatrix} a_1 & a_2 & \cdots & a_{p^{(k)}-1} & a_{p^{(k)}} \\ a_1 & a_2 & \cdots & a_{p^{(k)}-1} & b_{p^{(k)}} \\ \vdots & \vdots & \ddots & \vdots & \vdots \\ b_1 & b_2 & \cdots & a_{p^{(k)}-1} & a_{p^{(k)}} \\ b_1 & b_2 & \cdots & b_{p^{(k)}-1} & b_{p^{(k)}} \end{bmatrix}.$$

399 To prove the proposition, it suffices to show that, if  $\mathbf{p} \in \mathbb{R}^{p^{(k)}}$  is a unit  
400 vector such that the entries of the vector  $\mathbf{A}'\mathbf{p}$  satisfy  $[\mathbf{A}'\mathbf{p}]_i \in \{r, s\}$  for  
401 some  $r \neq s$ , for all  $i \in \{1, \dots, 2^{p^{(k)}}\}$ , then  $\mathbf{p}$  has exactly one non-zero  
402 entry. To do this, we proceed by induction on  $p^{(k)}$ : we first show that the  
403 result is true for  $p^{(k)} = 2$ , then, we prove that if it is true for  $p^{(k)} - 1$ , it  
404 implies that it is also true for  $p^{(k)}$ .

In the case  $p^{(k)} = 2$ ,  $\mathbf{A}'$  satisfies

$$\mathbf{A}' = \begin{bmatrix} a_1 & a_2 \\ a_1 & b_2 \\ b_1 & a_2 \\ b_1 & b_2 \end{bmatrix}.$$

405 We then need to show that if  $\mathbf{p} \in \mathbb{R}^2$  is a unit vector such that the  
 406 entries of the vector  $\mathbf{A}'\mathbf{p}$  satisfy  $[\mathbf{A}'\mathbf{p}]_i \in \{r, s\}$  for some  $r \neq s$ , for all  
 407  $i \in \{1, \dots, 4\}$ , then  $\mathbf{p}$  has exactly one non-zero entry. To this end, assume  
 408 that it is not the case and that both entries of  $\mathbf{p} = [p_1, p_2]^\top$  are non-zero.  
 409 In this case, since  $a_j \neq b_j$  for  $j \in \{1, 2\}$ , we have  $[\mathbf{A}'\mathbf{p}]_1 - [\mathbf{A}'\mathbf{p}]_2 \neq 0$ ,  
 410  $[\mathbf{A}'\mathbf{p}]_1 - [\mathbf{A}'\mathbf{p}]_3 \neq 0$  and  $[\mathbf{A}'\mathbf{p}]_2 - [\mathbf{A}'\mathbf{p}]_4 \neq 0$ . As  $[\mathbf{A}'\mathbf{p}]_i \in \{r, s\}$  for some  
 411  $r \neq s$ , we therefore have  $[\mathbf{A}'\mathbf{p}]_1 = [\mathbf{A}'\mathbf{p}]_4$  and  $[\mathbf{A}'\mathbf{p}]_2 = [\mathbf{A}'\mathbf{p}]_3$ . These  
 412 equalities implies that

$$\begin{cases} (a_1 - b_1)p_1 + (a_2 - b_2)p_2 = 0 \\ (a_1 - b_1)p_1 - (a_2 - b_2)p_2 = 0 \end{cases}.$$

413 This system of equations shows a contradiction, since adding these  
 414 equations implies  $(a_1 - b_1)p_1 = 0$ , which is not possible since  $a_1 \neq b_1$   
 415 and we had assumed that  $p_1 \neq 0$ . This implies that  $\mathbf{p} = [p_1, p_2]^\top$  has at  
 416 least one non-zero entry. Since  $\mathbf{p}$  has norm equal to 1, and therefore has  
 417 exactly one non-zero entry (equal to  $\pm 1$ ), which concludes the proof for  
 418 the case  $p^{(k)} = 2$ .

We next show that if it is true for  $p^{(k)} - 1$ , it implies that it is also true  
 for  $p^{(k)}$ . To this end, first note that for any  $i < j \in \{1, \dots, 2^{p^{(k)}}\}$  such  
 that  $\text{bin}(i - 1)$  and  $\text{bin}(j - 1)$  differ by exactly one bit, say the  $\ell^{\text{th}}$  one,  
 we have by construction that

$$[\mathbf{A}'\mathbf{p}]_i - [\mathbf{A}'\mathbf{p}]_j = (a_\ell - b_\ell)p_\ell.$$

Now assume that all components of  $\mathbf{p}$  are different from 0. By the last  
 equation, this implies that for any  $i < j \in \{1, \dots, 2^{p^{(k)}}\}$  such that  $\text{bin}(i - 1)$   
 and  $\text{bin}(j - 1)$  differ by exactly one bit, we have

$$[\mathbf{A}'\mathbf{p}]_i \neq [\mathbf{A}'\mathbf{p}]_j, \quad \text{since } a_\ell \neq b_\ell \text{ for all } \ell \in \{1, \dots, p^{(k)}\}.$$

419 Within the first four elements of  $\mathbf{A}'\mathbf{p}$ , this implies that  $[\mathbf{A}'\mathbf{p}]_1 \neq [\mathbf{A}'\mathbf{p}]_2$ ,  
 420  $[\mathbf{A}'\mathbf{p}]_1 \neq [\mathbf{A}'\mathbf{p}]_3$  and  $[\mathbf{A}'\mathbf{p}]_2 \neq [\mathbf{A}'\mathbf{p}]_4$ , or again that  $[\mathbf{A}'\mathbf{p}]_1 = [\mathbf{A}'\mathbf{p}]_4$  and

421  $[\mathbf{A}'\mathbf{p}]_2 = [\mathbf{A}'\mathbf{p}]_3$  since  $[\mathbf{A}'\mathbf{p}]_i$  can only take one of two possible values  
 422  $\{r, s\}$ . By extending this logic, we deduce that for all  $i$  such that  $\text{bin}(i-1)$   
 423 has an even number of 1's, we have  $[\mathbf{A}'\mathbf{p}]_1 = [\mathbf{A}'\mathbf{p}]_i$ , and  $[\mathbf{A}'\mathbf{p}]_1 \neq [\mathbf{A}'\mathbf{p}]_i$   
 424 otherwise. Specifically, with  $\mathcal{A}_1 = \{j \in \{1, \dots, 2^{p^{(k)}}\} : \sum_{\ell=1}^{p^{(k)}} [\text{bin}(j-1)]_\ell \text{ is even}\}$  and  $\mathcal{A}_2 = \{1, \dots, 2^{p^{(k)}}\} \setminus \mathcal{A}_1$ , we have  $[\mathbf{A}'\mathbf{p}]_i = [\mathbf{A}'\mathbf{p}]_j$  for all  
 425  $i, j \in \mathcal{A}_1$ , and  $[\mathbf{A}'\mathbf{p}]_i = [\mathbf{A}'\mathbf{p}]_j$  for all  $i, j \in \mathcal{A}_2$ .

427 Now note that for any  $\ell \neq \ell' \in \{1, \dots, p^{(k)}\}$ , there exists  $i, j \in \mathcal{A}_1$  such  
 428 that  $\text{bin}(i-1)$  and  $\text{bin}(j-1)$  are equal everywhere except in position  $\ell$  and  
 429  $\ell'$ , where their bits are flipped. Since  $i, j \in \mathcal{A}_1$  implies  $[\mathbf{A}'\mathbf{p}]_i = [\mathbf{A}'\mathbf{p}]_j$ ,  
 430 then

$$\begin{aligned} 0 &= [\mathbf{A}'\mathbf{p}]_i - [\mathbf{A}'\mathbf{p}]_j \\ &= \begin{cases} (a_\ell - b_\ell)p_\ell + (a_{\ell'} - b_{\ell'})p_{\ell'} & \text{if } [\text{bin}(i-1)]_\ell = 0, [\text{bin}(i-1)]_{\ell'} = 0 \\ (b_\ell - a_\ell)p_\ell + (a_{\ell'} - b_{\ell'})p_{\ell'} & \text{if } [\text{bin}(i-1)]_\ell = 1, [\text{bin}(i-1)]_{\ell'} = 0 \\ (a_\ell - b_\ell)p_\ell + (b_{\ell'} - a_{\ell'})p_{\ell'} & \text{if } [\text{bin}(i-1)]_\ell = 0, [\text{bin}(i-1)]_{\ell'} = 1 \\ (b_\ell - a_\ell)p_\ell + (b_{\ell'} - a_{\ell'})p_{\ell'} & \text{if } [\text{bin}(i-1)]_\ell = 1, [\text{bin}(i-1)]_{\ell'} = 1. \end{cases} \end{aligned}$$

431 Now let  $i', j'$  be such that  $\text{bin}(i-1)$  and  $\text{bin}(i'-1)$  are identical except at  
 432 position  $\ell'$ , where their bits are flipped, and  $\text{bin}(j-1)$  and  $\text{bin}(j'-1)$  are  
 433 identical except at position  $\ell'$ , where their bits are flipped. Then, since  
 434  $i, j \in \mathcal{A}_1$ , we have  $i', j' \in \mathcal{A}_2$ , which therefore implies  $[\mathbf{A}'\mathbf{p}]_{i'} = [\mathbf{A}'\mathbf{p}]_{j'}$   
 435 and that

$$\begin{aligned} 0 &= [\mathbf{A}'\mathbf{p}]_{i'} - [\mathbf{A}'\mathbf{p}]_{j'} \\ &= \begin{cases} (a_\ell - b_\ell)p_\ell - (a_{\ell'} - b_{\ell'})p_{\ell'} & \text{if } [\text{bin}(i-1)]_\ell = 0, [\text{bin}(i-1)]_{\ell'} = 0 \\ (b_\ell - a_\ell)p_\ell - (a_{\ell'} - b_{\ell'})p_{\ell'} & \text{if } [\text{bin}(i-1)]_\ell = 1, [\text{bin}(i-1)]_{\ell'} = 0 \\ (a_\ell - b_\ell)p_\ell - (b_{\ell'} - a_{\ell'})p_{\ell'} & \text{if } [\text{bin}(i-1)]_\ell = 0, [\text{bin}(i-1)]_{\ell'} = 1 \\ (b_\ell - a_\ell)p_\ell - (b_{\ell'} - a_{\ell'})p_{\ell'} & \text{if } [\text{bin}(i-1)]_\ell = 1, [\text{bin}(i-1)]_{\ell'} = 1. \end{cases} \end{aligned}$$

436 Adding the equations  $0 = [\mathbf{A}'\mathbf{p}]_i - [\mathbf{A}'\mathbf{p}]_j$  and  $0 = [\mathbf{A}'\mathbf{p}]_{i'} - [\mathbf{A}'\mathbf{p}]_{j'}$  leads  
 437 to a contradiction, as their validity would require that  $(a_\ell - b_\ell)p_\ell = 0$ .  
 438 However, this cannot hold under the assumption that all  $p_\ell$  are nonzero  
 439 and  $a_\ell \neq b_\ell$ . Therefore, there must exist at least one component of  $\mathbf{p}$  that  
 440 is equal to 0. Without loss of generality, assume that this component is  
 441 the first one, i.e.,  $p_1$ .

442 Consider the matrix  $\bar{\mathbf{A}}'$ , obtained by removing the first column of  $\mathbf{A}'$   
 443 and discarding its last  $2^{p^{(k)}-1}$  rows. Let  $\bar{\mathbf{p}} \in \mathbb{R}^{p^{(k)}-1}$  denote the vector

obtained by removing the first component of  $\mathbf{p}$ . Then  $\bar{\mathbf{p}}$  is a unit vector such that the entries of the vector  $\bar{\mathbf{A}}'\bar{\mathbf{p}}$  satisfy  $[\bar{\mathbf{A}}'\bar{\mathbf{p}}]_i \in r, s$  for some  $r \neq s$  and for all  $i \in 1, \dots, 2^{p^{(k)}-1}$ . By the induction hypothesis, it follows that  $\bar{\mathbf{p}}$  has exactly one nonzero component. Since  $\mathbf{p} = [0, \bar{\mathbf{p}}^\top]^\top$ , it follows  $\mathbf{p}$  also has exactly one nonzero component. This concludes the proof that if  $\mathbf{p} \in \mathbb{R}^{p^{(k)}}$  is a unit vector such that the entries of the vector  $\mathbf{A}'\mathbf{p}$  satisfy  $[\mathbf{A}'\mathbf{p}]_i \in \{r, s\}$  for some  $r \neq s$ , for all  $i \in \{1, \dots, 2^{p^{(k)}}\}$ , then  $\mathbf{p}$  has exactly one non-zero entry. The result follows.  $\square$

### 4.3 Proof of Proposition 2

Before establishing the proof of Proposition 2, consider the case  $p^{(k)} = 3$ . In this case, any orthogonal matrix  $\mathbf{P}$  can be obtained as  $\mathbf{P} = \mathbf{P}_\theta \mathbf{P}_\pi^\pm$  where, for  $\theta = (\theta_1, \theta_2, \theta_3) \in [0, 2\pi)$ ,

$$\mathbf{P}_\theta = \begin{bmatrix} \cos(\theta_1) & -\sin(\theta_1) & 0 \\ \sin(\theta_1) & \cos(\theta_1) & 0 \\ 0 & 0 & 1 \end{bmatrix} \begin{bmatrix} \cos(\theta_2) & 0 & -\sin(\theta_2) \\ 0 & 1 & 0 \\ \sin(\theta_2) & 0 & \cos(\theta_2) \end{bmatrix} \begin{bmatrix} 1 & 0 & 0 \\ 0 & \cos(\theta_3) & -\sin(\theta_3) \\ 0 & \sin(\theta_3) & \cos(\theta_3) \end{bmatrix}$$

(see for example [11]). Matrices of the form  $\mathbf{P}_\theta$  generate all orthogonal matrices  $\mathbf{P}$  with determinant equal to 1. Since  $\mathbf{X}_{\text{cs}}^{(k)} \mathbf{P}_\theta \mathbf{P}_\pi^\pm \in \mathbb{S}(\mathcal{K}^{(k)})$  and only if  $\mathbf{X}_{\text{cs}}^{(k)} \mathbf{P}_\theta \in \mathbb{S}(\mathcal{K}^{(k)})$ , to characterize the matrices belonging in the set  $\mathbb{S}(\mathcal{K}^{(k)})$  it suffices to search for the values of  $\theta \in (-\pi, \pi]^3$  such that  $\mathbf{X}_{\text{cs}}^{(k)} \mathbf{P}_\theta \in \mathbb{S}(\mathcal{K}^{(k)})$ . It follows from Proposition 1 that  $\mathbf{X}_{\text{cs}}^{(k)} \mathbf{P}_\theta \in \mathbb{S}(\mathcal{K}^{(k)})$  provided  $\theta \in (-\pi, \pi]^3$  satisfies  $\mathbf{g}(\theta \mid \tau_{12}^{(k)}, \tau_{13}^{(k)}, \tau_{23}^{(k)}) = [0, 0]^\top$ , where

$$\begin{aligned} g_1(\theta \mid \tau_{12}^{(k)}, \tau_{13}^{(k)}, \tau_{23}^{(k)}) &= \cos(\theta_1) \sin(\theta_1) \cos^2(\theta_2) \tau_{12}^{(k)} + \cos(\theta_1) \cos(\theta_2) \sin(\theta_2) \tau_{13}^{(k)} \\ &\quad + \sin(\theta_1) \cos(\theta_2) \sin(\theta_2) \tau_{23}^{(k)} \end{aligned}$$

and

$$\begin{aligned} g_2(\theta \mid \tau_{12}^{(k)}, \tau_{13}^{(k)}, \tau_{23}^{(k)}) &= \{-\sin(\theta_1) \cos(\theta_3) - \cos(\theta_1) \sin(\theta_2) \sin(\theta_3)\} \\ &\quad \times \{\cos(\theta_1) \cos(\theta_3) - \sin(\theta_1) \sin(\theta_2) \sin(\theta_3)\} \tau_{12}^{(k)} \\ &\quad - \{\sin(\theta_1) \cos(\theta_3) + \cos(\theta_1) \sin(\theta_2) \sin(\theta_3)\} \cos(\theta_2) \sin(\theta_3) \tau_{13}^{(k)} \\ &\quad + \{\cos(\theta_1) \cos(\theta_3) - \sin(\theta_1) \sin(\theta_2) \sin(\theta_3)\} \cos(\theta_2) \sin(\theta_3) \tau_{23}^{(k)}. \end{aligned}$$

By the Implicit Function Theorem [12], since the system consists of two continuously differentiable equations and three unknowns, the existence of a solution in the interior of  $(-\pi, \pi]^3$  implies that the system admits infinitely many solutions. Such a solution always exists, since  $\boldsymbol{\theta}_0 = \mathbf{0}$  corresponds to  $\mathbf{P}_{\boldsymbol{\theta}_0} = \mathbf{I}_{p^{(k)}}$  always satisfies  $\mathbf{X}_{\text{cs}}^{(k)} \mathbf{P}_{\boldsymbol{\theta}_0} = \mathbf{X}_{\text{cs}}^{(k)} \in \mathbb{S}(\mathcal{K}^{(k)})$ . The rank  $r$  of the Jacobian matrix of  $\mathbf{g}(\cdot \mid \tau_{12}^{(k)}, \tau_{13}^{(k)}, \tau_{23}^{(k)})$  at the solution determines the dimension of the solution set, but regardless of the rank, the solution set is infinite: it is locally a manifold of dimension  $3 - r$ .

The following proof formalizes this argument.

*Proof of Proposition 2.* By Proposition 1,  $\mathbf{A} \in \mathbb{S}(\mathcal{K}^{(k)})$  if and only if  $\mathbf{A} = \mathbf{X}_{\text{cs}}^{(k)} \mathbf{P}$ , with  $\mathbf{P} \in \mathcal{M}_{p^{(k)}, p^{(k)}}(\mathbb{R})$  an orthogonal matrix satisfying (14). Moreover, any orthogonal  $\mathbf{P} \in \mathcal{M}_{p^{(k)}, p^{(k)}}(\mathbb{R})$  can be expressed as  $\mathbf{P} = \mathbf{P}_{\boldsymbol{\theta}} \mathbf{P}_{\pi}^{\pm}$ , where  $\mathbf{P}_{\boldsymbol{\theta}}$  is a rotation matrix parametrized using the Givens rotation basis described in the statement of the proposition. Recalling the definition of  $\mathbf{g}(\boldsymbol{\theta})$  in the statement of the proposition, and noting that  $\mathbf{A} \in \mathbb{S}(\mathcal{K}^{(k)})$  if and only if  $\mathbf{A} \mathbf{P}_{\pi}^{\pm} \in \mathbb{S}(\mathcal{K}^{(k)})$ , it suffices, to prove the proposition, to show that the set  $\{\boldsymbol{\theta} : \mathbf{g}(\boldsymbol{\theta}) = \mathbf{0}\}$  has infinite cardinality. This follows directly from the smoothness of  $\mathbf{g}(\boldsymbol{\theta})$ , the fact that when  $p^{(k)} \geq 3$  the dimension of  $\boldsymbol{\theta}$  exceeds the number of equations defined by  $\mathbf{g}(\boldsymbol{\theta}) = \mathbf{0}$ , the existence of a solution  $\boldsymbol{\theta}_0 \in (-\pi, \pi)^{p^{(k)}(p^{(k)}-1)/2}$  satisfying  $\mathbf{g}(\boldsymbol{\theta}_0) = \mathbf{0}$  (i.e., the solution  $\boldsymbol{\theta} = \mathbf{0}$ , which corresponds to  $\mathbf{P}_{\boldsymbol{\theta}} = \mathbf{I}_{p^{(k)}}$ ), and an application of the Implicit Function Theorem.  $\square$

#### 4.4 Privacy assessment - Empirical criterion

An empirical criterion was derived to verify if, using the quantities available at the covariate-nodes, every entry of the response-node's data can be flipped (recall  $\mathbf{y} \in \{-1, 1\}^n$ ) while still leading to an admissible candidates for the response vector. This criterion, based on theoretical details from in Methods 4.3.2, is described in Algorithm 1 to support numerical implementation. We recall that the solution space that defines the solutions derived from the shared quantity  $\hat{\mathbf{c}}^{\lambda(k)}$  is given by

$$\mathbb{S}(\hat{\mathbf{c}}^{\lambda(k)}) = \{\mathbf{y}^{\dagger} \in \{-1, 1\}^n : \mathbf{y}^{\dagger} = \text{sign}\{\text{diag}(\hat{\boldsymbol{\alpha}}^{\lambda})\mathbf{y} + \mathbf{W}\mathbf{b}\}, \\ \text{with } \text{diag}(\hat{\boldsymbol{\alpha}}^{\lambda})\mathbf{y} + \mathbf{W}\mathbf{b} \in (-1, 1)^n\},$$

This criterion can be verified at the response-node for any covariate-node  $k$  not co-located at the response-node.

---

**Algorithm 1** Empirical criterion for the privacy assessment of the response vector  $\mathbf{y}$  at covariate-node  $k$

---

**Input:** Gram matrix  $\mathcal{K}^{(k)}$  from covariate-node  $k$ , response vector  $\mathbf{y}$  and dual numerical estimate  $\tilde{\alpha}^\lambda$ .

**Output:** Number of entries of the vector  $\mathbf{y}$  that could be flipped.

**Procedure:**

1. Generate  $\mathbf{W}$  in the null-space of  $\mathcal{K}^{(k)}$ .
  2. For every  $i \in \{1, \dots, n\}$ , verify if  $\exists \mathbf{x}_0$  such that  $\text{sign}(x_{0i}) \neq \text{sign}(y_i)$ , where  $\mathbf{x}_0 = \text{diag}(\tilde{\alpha}^\lambda)\mathbf{y} + \mathbf{W}\mathbf{b} \in (-1, 1)^n$ .
  3. Count the number of entries  $y_i$  that satisfied the condition.
- 

## References

- [1] Sion, M.: On general minimax theorems. Pacific Journal of Mathematics **8**(1), 171–176 (1958)
- [2] Rockafellar, R.T.: Convex Analysis. Princeton University Press, Princeton, NJ, USA (1970). <https://doi.org/10.1515/9781400873173>
- [3] Wedderburn, R.W.M.: On the Existence and Uniqueness of the Maximum Likelihood Estimates for Certain Generalized Linear Models. Biometrika **63**(1), 27–32 (1976) <https://doi.org/10.2307/2335080>
- [4] Albert, A., Anderson, J.A.: On the existence of maximum likelihood estimates in logistic regression models. Biometrika **71**(1), 1–10 (1984)
- [5] Vaart, A.W.v.d.: Asymptotic Statistics. Cambridge series in statistical and probabilistic mathematics. Cambridge University Press, Cambridge, UK (2000)
- [6] Bertsekas, D.P.: Nonlinear Programming. Athena Scientific, Belmont, MA, USA (1999)
- [7] Bertsekas, D.P.: Projected Newton Methods for Optimization Problems with Simple Constraints. SIAM Journal on Control and Optimization **20**(2), 221–246 (1982) <https://doi.org/10.1137/0320018>
- [8] Schmidt, M., Kim, D., Sra, S.: Projected Newton-type Methods in Machine Learning. In: Sra, S., Nowozin, S., Wright, S.J. (eds.) Optimization for Machine Learning, pp. 305–330. The MIT Press, Cambridge, MA, USA (2011). <https://doi.org/10.7551/mitpress/8996.003.0013>
- [9] Boyd, S.P., Vandenberghe, L.: Convex Optimization. Cambridge university press, Cambridge, United Kingdom (2004)
- [10] Horn, R.A., Johnson, C.R.: Matrix Analysis, 2nd edn. Cambridge university press, New York, NY, USA (2012)



- 520 [11] Cornwell, J.F.: Group Theory in Physics: An Introduction vol. 1. Academic press,  
521 San Diego, CA (1997)
- 522 [12] Rudin, W.: Principles of Mathematical Analysis, Third edition edn. Interna-  
523 tional series in pure and applied mathematics. McGraw-Hill, New York, NY, USA  
524 (1976)
